# Supplementary material for: Dynamic tracking of native precursors in adult mice
Source: eLife. 2024 Dec 5;13:RP97504. doi: 10.7554/eLife.97504 (PMC11620740; doi:10.7554/eLife.97504)
Supplement: Figure 1—figure supplement 1—source data 1. [file elife-97504-fig1-figsupp1-data1.xlsx]

## Sheet: Panel A
Table 1
	log10(CV)	CFP	RFP	YFP	Ganuza et al
	-0.93648	3.39794			3.39794
	-1.17889		3.39794		3.39794
	-1.20029			3.39794	3.39794
	-0.693549	3			3
	-1.08783		3		3
	-1.05408			3	3
	-0.436123	2.69897			2.69897
	-0.832799		2.69897		2.69897
	-0.807321			2.69897	2.69897
	-0.228751	2			2
	-0.437189		2		2
	-0.710856			2	2
	-0.052319	1.69897			1.69897
	-0.341239		1.69897		1.69897
	-0.427873			1.69897	1.69897

## Sheet: Panel B
Table 1
CFP	RFP	YFP
18.9555	35.6495	45.395
23.4153	34.6712	41.9135
15.7328	30.8355	53.4317
18.5927	35.3118	46.0955
20.1719	34.0892	45.7388
21.357	32.3857	46.2436
23.8636	32.5712	43.5652
19.7334	34.2724	45.9942
19.8123	32.9667	47.221
20.1619	32.1797	47.6425
23.4749	29.0194	47.5057
19.0644	34.9162	46.0194
20.3395	36.7823	42.8635
25.3291	33.4829	41.1879
20.5033	36.869	42.6134
20.2448	33.4275	46.2649
21.5824	34.5922	43.8254
24.3595	35.1939	40.4322
22.0868	30.6188	47.2944
20.0423	36.9155	43.0141
23.3068	32.553	44.1402
20.022	37.711	42.2396
25.6497	30.508	43.798
17.9654	33.4748	48.5446
18.0915	37.3119	44.5966
20.9613	34.835	44.1894
13.915	32.1402	53.9448
14.8405	37.4911	47.64
13.683	37.6795	48.6376
19.5803	37.36	43.0597
17.0252	35.4274	47.5473
16.4402	38.5098	45.0202
16.2468	34.8927	48.8605
17.5635	36.8451	45.5914
18.4125	38.4044	43.1695
13.4092	33.5365	53.0543
15.9576	37.2027	46.8397
10.5595	39.8822	49.5583
14.9629	37.4527	47.5693
13.5335	33.738	52.7284
18.107	38.8813	42.9508
16.6289	34.8199	48.5387
9.5641	40.3212	50.1147
11.9547	38.9757	49.0695
17.1615	42.6339	40.2046
14.5896	46.6868	38.7236
18.0136	37.9062	44.0802
8.48858	36.7082	54.8032
9.22023	43.7217	47.0451
10.8837	52.4186	36.6977
13.4939	37.9425	48.5636
8.55343	44.2553	47.1645
4.03018	31.0821	64.8693
9.58487	34.277	56.1
15.812	40.6695	43.5007
17.6116	39.4092	42.9651
11.1822	29.6602	59.1576
21.2105	35.227	43.5351
12.9337	42.3413	44.725
14.0382	35.6051	50.3567
15.1798	37.3901	47.4301
14.3343	38.4566	47.2092
6.255	32.2988	61.4462
23.322	36.2976	40.365
10.5853	48.1798	41.2349
13.7941	45.6266	40.565
13.9435	37.7584	48.2476
21.5478	40.378	38.0604
6.83651	38.3798	54.7837
11.1256	46.5305	42.3439
11.4056	32.1536	56.4408
13.0428	34.5797	52.3774
22.2222	42.655	35.1228
1.97991	47.6655	50.3251
13.1185	27.3807	59.5008
4.9619	11.182	83.8207
6.36011	18.9429	74.697
13.8496	14.4157	71.7145
13.1	30.7619	56.1381
8.23613	36.4616	55.3022
14.1796	40.1514	45.6253
19.9025	30.8382	49.2398
2.90115	42.7845	54.2994
15.2096	24.5723	60.2181
1.02162	39.9857	58.9808
12.6278	24.2194	63.1528
14.4149	25.0796	60.4952
10.623	37.0328	52.3057
7.84283	31.9615	60.1646
8.96295	42.6206	48.3958
16.7195	46.2206	37.0599
2.16073	28.7844	69.0548
16.5045	29.3323	54.1633
27.7436	7.94557	64.245
22.083	20.8713	57.032
24.0858	41.9776	33.9366
8.27765	34.5583	57.1455
1.32044	38.0324	60.6286
10.709	67.0359	22.2304
3.15829	38.5535	58.2508
4.63129	59.2626	36.1061
6.37759	27.8893	65.6825
7.32302	32.0722	60.5904
7.28524	26.673	66.0418
28.9918	49.2543	21.7141
0.720721	56.5916	42.6727
4.64404	80.6073	14.7231
20.4045	11.5209	68.0746
16.0776	7.61714	76.3052
4.79904	28.9542	66.2468
0.260682	40.7571	58.9822
1.81649	14.4853	83.6982
16.6433	40.1377	43.219
2.7027	36.0811	61.1937
12.0983	26.9094	60.9801
7.3809	35.9027	56.6551
27.7017	51.5628	20.715

## Sheet: Panel C
Table 1
	CFP	RFP	YFP
0.387259	3.39794
0.494078	3
0.674925	2.69897
0.85157	2
0.942539	1.69897
0.349922		3.39794
0.486034		3
0.757633		2.69897
1.04734		2
1.24393		1.69897
0.454116			3.39794
0.618971			3
0.875119			2.69897
1.04834			2
1.285			1.69897

## Sheet: Panel D
Table 1
	Seeded	6	10	14
	50	50.6546	50.9606	52.1298
	50	49.6475	48.2863	48.4328
	50	49.2958	50.2518	50.404

## Sheet: Panel E
Table 1
Left	+	-	-random
	60.4899		60.4899
	69.5698	69.5698	69.5698
	67.0135	67.0135	67.0135
	67.846	67.846	67.846
	65.8689	65.8689	65.8689
	67.4948	67.4948	67.4948
	66.0788	66.0788	66.0788
	70.6861	70.6861	70.6861
	62.7207	62.7207	62.7207
	68.1913	68.1913	68.1913
	67.4948	67.4948	67.4948
	68.6598	68.6598	68.6598
	65.9783	65.9783	65.9783
	67.1991	67.1991	67.1991
	66.3158	66.3158	66.3158
	69.0126	69.0126	69.0126
	66.0021	66.0021
	68.8935	68.8935	68.8935
	68.5205	68.5205	68.5205
	68.0962	68.0962	68.0962
	64.0756	64.0756	64.0756
	67.2956	67.2956	67.2956
	69.719	69.719	69.719
	67.1891	67.1891	67.1891
Middle	+	-	-random
	2.264	1.813	2.303
Right	+	-	-random
	751.587	1166.97	726.129

## Sheet: Panel F
Table 1
	10	100	1000	10000
10		0.1215
100	0.2602	0.08096	0.05961	0.03791
1000	0.2564	0.08003	0.02601	0.02353
10000	0.2626	0.0822	0.02141	0.01022

## Sheet: Panel G
Table 1
	10	100	1000	10000	100000
3	0.587752	0.590291	0.573214	0.653114	0.468477
4	0.285786	0.378737	0.404291	0.426799	0.442661
5	0.250986	0.245559	0.322184	0.24692	0.344135
6	0.28451	0.274442	0.310052	0.266194	0.432279
7	0.22404	0.251564	0.276273	0.184557	0.239692
8	0.145458	0.214991	0.263509	0.211953	0.174983
9	0.189418	0.171572	0.336912	0.252172	0.263434
10	0.127067	0.158729	0.208082	0.174355	0.169887
11	0.144342	0.150362	0.172072	0.15608	0.221604
12	0.147958	0.136723	0.167072	0.172228	0.20282
13	0.142935	0.161517	0.232613	0.119078	0.156939
14	0.117242	0.103453	0.136177	0.124909	0.152392
15	0.111847	0.114524	0.219747	0.132648	0.168643
16	0.0847879	0.0994926	0.19346	0.110135	0.150645
17	0.0906498	0.108504	0.131424	0.12534	0.170843
18	0.10977	0.117578	0.139256	0.119973	0.139123
19	0.102432	0.101725	0.134038	0.128114	0.11601
20	0.0869435	0.113563	0.125535	0.133481	0.126081

## Sheet: Panel H
Table 1
3	5.51536	4.61132	4.20541	4.67291	3.61442
4	3.1352	3.24989	3.1444	3.10075	3.3614
5	2.77246	2.09567	2.5569	1.82194	2.69826
6	3.02028	2.37066	2.36907	1.98225	3.34842
7	2.66284	2.23068	2.18928	1.40119	1.87083
8	1.56275	1.79398	2.06156	1.55716	1.39403
9	2.03205	1.50768	2.60714	1.86045	2.07802
10	1.46347	1.36327	1.6536	1.29538	1.33735
11	1.57924	1.29232	1.3551	1.17998	1.75171
12	1.68019	1.20795	1.33049	1.27484	1.60361
13	1.61814	1.42039	1.81205	0.89495	1.24038
14	1.33617	0.921515	1.10225	0.936634	1.21108
15	1.28499	1.01043	1.71435	1.00572	1.33
16	0.952571	0.87257	1.51085	0.827183	1.19653
17	1.03256	0.95436	1.04882	0.940969	1.35367
18	1.24507	1.01049	1.11518	0.90893	1.10251
19	1.12429	0.897764	1.06196	0.960911	0.917533
20	1	1	1	1	1
