# Supplementary material for: Dynamic tracking of native precursors in adult mice
Source: eLife. 2024 Dec 5;13:RP97504. doi: 10.7554/eLife.97504 (PMC11620740; doi:10.7554/eLife.97504)
Supplement: Figure 1—source data 1. [file elife-97504-fig1-data1.xlsx]

## Sheet: Figure 1D
Table 1
Figure 1D	replicate 1
Sorted	49.3927	54.1033	49.3927	49.6957
1	0.909091	100	100	100	99.8671	99.8726	100	100	100	99.8479	0	100	0.564617	0.170906	100	100	0.576963	0.352917	100	100	100	0	1.28932	0.418752	100	0.938708	0.694934	99.8299	0.367872	1.68655	0.540651	0	0.179571	0	0.538454	0.180759	0.4884	100	0.181671	100	100	100	0.182223	0.692841	100	0.121433	100	0	99.8493
10	45.0207	64.9194	60.202	41.9192	16.3223	25.4564	80.9091	71.6022	27.3737	39.3089	29.0061	29.1314	17.8068	22.6358	27.3279	81.3627	18.2796	1.6609	70.4	86.1336	31.1245	78.1022	96.3069	25.4132
100	38.6389	36.9198	38.4298	43.4555	55.8793	53.8941	38.2845	53.481	35.3493	45.2256	52.5547	45.4357	51.8858	52.9095	40.1053	56.7901	45.1441	45.9431	58.9882	64.308	60.5069	66.077	48.366	42.4431
1000	53.524	57.7915	50.1033	52.8807	54.6012	56.8205	53.2787	53.3811	55.0769	53.5457	53.354	52.3614	51.3602	58.2653	57.8732	50.5123	58.0145	52.9351	51.7986	49.5366	54.359	52.7235	53.6961	52.2051
10000	52.28	52.5751	54.0193	53.953	54.6908	52.1459	52.4731	52.8587	52.739	53.682	52.2019	51.6649	52.6092	52.1081	54.0254	53.6093	54.6129	51.0074	53.9851	53.1416	53.6741	51.4862	52.6652	53.0983
100000	50.9054	51.1581	50.9054	50.9073	51.5609	51.2097	51.2097	51.2097	51.0574	51.1604	51.0081	51.0081	51.5121	51.7137	50.7056	51.4691	51.2097	51.1604	51.3623	51.2588	51.5121	51.0595	51.7659	51.2614
[truncated: 113 more columns]

## Sheet: Figure 1E
Table 1
Figure 1E	1	10	100	1000	10000	100000
	0.5027	0.2702	0.08886	0.0249	0.009839	0.00266
	0.4826	0.2626	0.0822	0.02141	0.01022	0.002645
	0.499351	0.339102	0.0988404	0.0176903	0.0127299	0.00200054

## Sheet: Figure 1F
Table 1
Figure 1G	Number	ALL
	-0.0045276	-0.2987
	0.778151	-0.5683
	1.77815	-1.0513
	2.77815	-1.6038
	3.77815	-2.007
	4.77815	-2.5751
	-0.0046841	-0.3164
	0.805371	-0.5807
	1.775	-1.0851
	2.87766	-1.6694
	3.68519	-1.9905
	4.76666	-2.5776
	0	-0.3016
	0.758091	-0.4697
	1.75809	-1.0051
	2.75809	-1.7523
	3.75809	-1.8952
	4.75809	-2.6989

## Sheet: Figure 1G
Table 1
Figure 1G	Expected Number			All			outlier
0	0			-0.0045276	-0.0046841	0.00108672
1	1			0.696552	0.805371	0.579176
2	2			1.77148	1.775	1.64249
3	3			2.9461	2.87766	3.14211
4	4			3.59406	3.68519	3.42739
5	5			4.77202	4.76666	5.04019
6	6						5.49839
7							5.13321
