# Supplementary material for: Dynamic tracking of native precursors in adult mice
Source: eLife. 2024 Dec 5;13:RP97504. doi: 10.7554/eLife.97504 (PMC11620740; doi:10.7554/eLife.97504)
Supplement: Figure 2—figure supplement 1—source data 1. [file elife-97504-fig2-figsupp1-data1.xlsx]

## Sheet: Panel C
Table 1
	Induced										Non-induced
Live cells	8.8	12.7	5.9	3.8	7.6	8.9	7.3	7.3	7.3	5.6	1.1	1.1	0.9
Lin-	11.8	14.1	11	10.1	12.7	11.7	11.2	9.9	12	11.3	1.2	1.1	1.1
CMP	4.7	5.7	3.6	4.5	4.5	5.9	6.6	4.8	4	5.3	0.1	0	0.2
GMP	2.9	3.8	2.7	2.4	3.3	3.3	4.1	2.4	2.6	3	0.6	0.2	0.3
MEP	0.3	2.9	0.9	0.4	0.4	0.7	0.4	0.5	0.4	0.5	0.3	0.7	2.7
LT-HSC	4.2	3.1	3.4	5.2	5.1	5.5	8	4.5	2.5	3.7	0	0	0
ST-HSC	2.3	3.6	3.1	3	3.2	3.9	4.3	3	2.9	3.5	0	0	0
MPP2	5.4	5.6	4.2	4.6	4.3	5.4	7.3	4	4.4	5.9	0	1.7	0
MPP3	2.1	1.9	3.4	3.4	2.5	3.2	3.8	1.7	2.5	3	0	0	0
MPP4	1.7	1.9	1.6	1.6	1.7	3.2	2.6	1.7	1.6	2	0	0	0.2

## Sheet: Panel E
Table 1
	Induced										Non-induced
B cells	0.7	0.7	0.7	0.7	0.7	0.6	0.6	0.8	0.6	0.7	0.3	0.5	0.4
CD8 T cells	18.6	21.3	16	17.1	16.3	21.9	22.3	20.4	21.5	20.8	0.4	0.6	0.6
CD41+ cells	3.3	4.4	4.7	4.7	5.8	3.3	3.9	3.2	5.1	3.9	0.9	0.9	0.9
CD11b+Neutrophil	0	0	0	0	0	0	0	0	0	0	0	0	0
Inflammatory monocyte	0.5	0.5	1.2	1.1	0.8	0.8	0.9	0.8	0.2	0.6	0.5	0.6	0.6
Non-inflammatory monocyte	1.8	5.1	6.3	8.6	9.7	7.5	6.2	7.2	6	8.5	1.7	0.9	1.1
NK cells	7.8	8.6	8.4	8	8.1	10.2	9.2	11.1	6.9	12.4	1.3	0.7	0.4
Dendritic cells	4.6	4.5	4.5	5.3	4.7	5.3	4.6	4.7	2.7	4.3	3	2.6	3.2

## Sheet: Panel G
Table 1
	Induced										Non-induced
B cells	0.3	0.3	0.3	0.3	0.2	0.2	0.3	0.5	0.2	0.4	0.1	0.1	0.1
B220-CD3e-	2.6	1.9	1	1	1.5	1.7	2.4	1.7	0.9	2	0.8	1.1	1.4
CD4 T cells	9.8	10.3	9.6	9.4	8.5	11.8	13.3	11.6	10.2	10.8	2.4	4	2
CD8 T cells	25.6	24.3	20.6	20.5	18.5	28.1	27.5	24.7	24.2	23.7	0.9	0.7	1.5
