# Supplementary material for: Dynamic tracking of native precursors in adult mice
Source: eLife. 2024 Dec 5;13:RP97504. doi: 10.7554/eLife.97504 (PMC11620740; doi:10.7554/eLife.97504)
Supplement: Figure 2—figure supplement 2—source data 1. [file elife-97504-fig2-figsupp2-data1.xlsx]

## Sheet: Panel B
Table 1
Left	Non-induced	Induced	Right	Non-induced	Induced
		3.79			3.5
	0			0
	0			0
	0.032			0
	0			0
	0			0.0057
	0			0
	0			0
	0.00828			0

## Sheet: Panel D
Table 1
HSC-Scl-CreERT	Vav-Cre
0.14	14.3
0.67	16.5
0.4	15.1
0.066
0.095
0.088
0.24
0.24
