# Supplementary material for: Dynamic tracking of native precursors in adult mice
Source: eLife. 2024 Dec 5;13:RP97504. doi: 10.7554/eLife.97504 (PMC11620740; doi:10.7554/eLife.97504)
Supplement: Figure 2—figure supplement 3—source data 1. [file elife-97504-fig2-figsupp3-data1.xlsx]

## Sheet: Panel A
Table 1
	Simulated										1-to-1 Linear
0	0.145064	0.164182	0.162589	0.146098	0.148994	0.147097	0.133176	0.126917	0.133091	0.131323	0
0.30103	0.262226	0.277154	0.290685	0.278347	0.291354	0.287667	0.299971	0.304086	0.29962	0.269811	0.30103
0.477121	0.397757	0.396097	0.399051	0.381909	0.424626	0.402607	0.375272	0.427428	0.382353	0.395857	0.477121
0.60206	0.475358	0.466231	0.508663	0.488419	0.469582	0.481387	0.466687	0.490215	0.491473	0.477696	0.60206
0.69897	0.573794	0.60468	0.576101	0.56137	0.569548	0.560158	0.562744	0.537822	0.585603	0.563837	0.69897
0.778151	0.638036	0.678793	0.632389	0.646211	0.621274	0.664425	0.645625	0.620073	0.629	0.626321	0.778151
0.845098	0.698598	0.765019	0.681187	0.700053	0.710554	0.713594	0.707849	0.69758	0.773526	0.733012	0.845098
0.90309	0.811701	0.754394	0.782885	0.752065	0.773189	0.766311	0.79396	0.741795	0.774963	0.766275	0.90309
0.954243	0.81227	0.805067	0.808146	0.803567	0.850068	0.823623	0.874584	0.873961	0.836431	0.832045	0.954243
1	0.88144	0.904071	0.895987	0.886962	0.875343	0.826651	0.869603	0.857588	0.908457	0.869356	1
1.69897	1.65461	1.68374	1.67536	1.68897	1.66501	1.62686	1.69083	1.71322	1.68746	1.74602	1.69897
2	2.02813	1.98204	2.00105	1.96997	1.99235	1.95729	2.01826	1.94258	1.99315	2.0291	2
2.69897	2.69277	2.6751	2.71448	2.73921	2.6695	2.72099	2.70795	2.71365	2.73829	2.66462	2.69897
3	2.97991	3.03452	2.97202	3.00588	2.99806	3.04441	3.0115	3.03519	3.03808	2.96111	3
3.69897	3.66637	3.65753	3.73836	3.71998	3.65302	3.71002	3.63614	3.66363	3.73813	3.68352	3.69897
4	4.00373	4.02194	3.96568	3.97439	4.00264	3.97571	3.9578	3.9316	4.03206	4.03084	4

## Sheet: Panel C
Table 1
Left panel
1-month			1-month			2 months			2 months			3 months			3 months			4 months			4 months
High-precursor			Low-precursor			High-precursor			Low-precursor			High-precursor			Low-precursor			High-precursor			Low-precursor
1	2	3	1	2	3	1	2	3	1	2	3	1	2	3	1	2	3	1	2	3	1	2	3
34.8697		35.8068	38.0137	24.2514	4.21634	33.6784	42.8058	23.5721	6.14798	41.0173	0.833194	34.9829	42.7632	27.7649	9.26316	12.4088	0.49636	28.7105	42.5661	31.6781	11.9393	6.26789	0.366709
39.7163	38.9493	41.3981		10.2985	59.5843		44.5886	34.9157	16.9515		89.8087	56.1875	43.9883	32.8392	11.8348	55.787	90.9419	56.0748		27.5726	8.49458	63.3661	91.7692
36.5994	37.4689	32.8029	37.0321	12.6316	1.27871	39.4955	46.3446	34.3179		15.5594	19.3182	36.7804	46.6608	37.7125	97.1345	15.1586	22.8997	30.8783	37.9953	41.9419	97.723	14.2235	24.2702
31.8707	39.9398	33.1527	39.0275	22.0149	14.6501	49.0895	35.5154	32.3108	3.02683	13.7279	6.33333	48.3061	32.1656	41.9687	3.22483	24.7148	5.51724	49.0251	30.5471	44.5434	3.31867	25.9939	4.01366
44.7746	33.0076	32.2305	43.5371	22.2805	58.9563		42.685	35.5573	11.3169	18.732	56.2823	40.5728	32.0245	33.0149	6.98772	11.8998	56.8507	49.3005	27.0127	36.7989	3.90642	24.5552	62.988
42.4198	33.2093	34.5316	45.2632	1.72977	13.2321	42.777	40.5791	47.3602	70.6911	0.19245	48.419	36.0206	42.3573	45.6476	78.705	0.0983106	50.8523	29.541	47.8367	44.7613	81.1342	0.0937392	50
	35.4334		52.7333		38.2898	34.3105	33.5344	42.3878	84.3629	97.9263	19.822	38.1679	36.6605	39.5356	69.3182	98.3926	19.8473	32.9734	35.2201	37.9935		98.8095	21.9971
39.953	35.2157	38.0593	52.7396	10.7864	33.657	43.4783	37.7289	29.6158	30.9257	78.125	94.026	44.2571	38.4992	32.2981	7.12909	82.0734	97.076	47.1217	29.8817	32.2835	3.9751	81.8355	96.5805
45.354	32.5469	29.7332	50.2734	10.0621		38.7409	35.4182	23.5214	97.6649		38.3857	42.3857	37.7958	21.158	98.6974		44.0872		38.807	20.3791	99.2594		54.6292
47.4795			1.58192			41.9735	46.6454		1.00287			42.7734	48.1129		0.754717			35.2941	46.4		0.243754
41.6579			7.44913			45.3915			65.1757			48.8193			80.59			48.8323			84.5443
40.8033			25.0973			32.677			84.3039			26.8813			89.6283			25.9645			81.3567
45.8953			13.4071			49.8366			9.64366			50.7545			22.0989			46.8023			40.2142
39.8947			74.6934			41.1593			12.6728			45.0549			9.16468			43.5206			5.75693
42.1681						32.8999						27.2437						24.3491
Right panel
1-month			1-month			2 months			2 months			3 months			3 months			4 months			4 months
High-precursor-1			Low-precursor-1			High-precursor-2			Low-precursor-2			High-precursor-3			Low-precursor-3			High-precursor-4			Low-precursor-4
1	2	3	1	2	3	1	2	3	1	2	3	1	2	3	1	2	3	1	2	3	1	2	3
41.4286	39.0595	65.58	3.40326	25	0.573066	44.145	41.9775	35.5258	31.6557	53.2067	89.0219	38.3426	49.2857	26.0595	17.9372	19.1825	88.4025	30.1703	46.2309	28.6872	16.8715	8.01737	88.0806
50	9.77564	16.6667	71.8866	20	15.3987		39.6567	46.2347	34.7003		22	66.1882	47.5375	42.1196	10.8522	35.0211	24.3034			32.622	6.93531	42.1546	24.248
33.0165		9.91432	71.708	90.9886	0	45.7168	47.9307	26.7482		41.3822	0	42.8531	48.6375	26.5675	95.0324	35.3993	0.0940091	38.6497	36.4726	39.176	96.668	27.8034	0
39.8305	38.9381	74.9659	51.9461	11.2108	10.6677	31.8534	40.478	42.0168	17.0338	45.7426	44.3874	39.5147	26.7229	39.3621	15.3079	21.8341	73.9857	34.6465	25.4902	43.1034	13.3611	24.7809	76.1948
36.1742	26.3923	60.1685		0	42.7273	48.3229	42.5706	44.3674	28.1641	2.60708	57.7253	38.1001	41.4179	42.5787	10.8367	4.14013	37.561	44.2073	33.6754	41.0016	5.10406	0	39.2754
68.6003	16.0959	40.9091	78.8436	0	35	58.8571		38.9551	91.1736	0	32.4838	57.8694	35.6019	48.1322	83.0508	0	18.482	36.9764	44	46.807	71.6287	0	17.7294
70.7418	21.2245		64.2464	41.9463	0	37.9716		42.2014	90.455	95.2202	94.1176	41.1765	35.8386	37.9787	93.3044	97.6851	99.0048	36.3137	41.4658	42.4469		97.2371	99.5043
11.7248	19.0275	31.1715	73.571	91.771		52.3282	40.9974	16.6052	58.4448	60.715	16.7112	48.6769	37.9939	22.1014	43.6306	83.0414	22.0708	48.5885	34.0314	26.3589	15.8981	87.3402	22.4407
40.6074	31.6877	11.9427	52.0833	36.5079		64.0681	35.9158	28.9655	93.9738			44.4196	39.2679	24.1796	97.7931				33.4239	19.0892	98.8721
47.4969			0.318066	0.145889		42.5747	41.621		0.807985	0.0565374		42.4643	53.6986		0.479145	0		33.9181	55.2789		0.10318	0.0653168
80.1402			6.25			49.5698			21.5722			56.3883			68.8			52.5411			81.6203
			0.351458			28.6531			10.7181			21.183			79.0411			18.2355			80.8619
36.4035			8.28402			53.7578			4.2404			60.4968			4.09893			48.9403			4.83384
57.1827			43.7594			44.7992			30.5823			55.5556			9.04786			48.8155			4.82938
75.9542						44.7697						31.5689						23.9898

## Sheet: Panel D
Table 1
1-month			1-month			2 months			2 months			3 months			3 months			4 months			4 months
High-precursor-1			Low-precursor-1			High-precursor-2			Low-precursor-2			High-precursor-3			Low-precursor-3			High-precursor-4			Low-precursor-4
1	2	3	1	2	3	1	2	3	1	2	3	1	2	3	1	2	3	1	2	3	1	2	3
32.6797	25.1619	39.3222	8.83286	17.5512	10.2941	22.6782	16.0023	24.5604	4.87211	10.3495	29.9615	24.8918	12.8082	20.5314	12.136	76.33	20.4033	26.1905	14.4793	12.9129	28.0093	95.053	12.7273
18.1307	24.5405	22.405	45.9009	41.1483	15.7823		21.3215	22.3621	0.681875		22.0238	20.3107	24.1131	38.2344	0.29649	6.27168	23.3539	22.2725		39.9408	0.257616	6.66803	16.1345
24.522	18.2747	23.4001	1.06796	57.7005	4.10194		21.5799	34.5304		0.867824	0.631671	38.2743	31.358	38.7952	4.76948	0.634424	0.85335	34.0122	30.8026	35.9338	1.76693	1.94175	0.92107
25.2799	27.4907	35.4402	20.904	67.6118		24.4857	24.6341	24.3431	12.6898	16.2579	3.57143	21.6623	21.4253	21.9925	32.3671	2.65788	4.84293	18.499	19.0964	23.6786	28.7805	2.57833	2.44289
25.6454	28.015	34.4238	12.9492	6.96629	0.270149	30.0215	26.6289	31.3953	30.0546	0.413927	0.119776	31.0145	17.2964	35.9173	37.037	10.0592	0.0968836	35.0566	11.4878	36.3196	46.6147	50.4505	0.0334969
24.6248	26.6981	25.8577	3.84487	97.8204	9.10999	16.2457	26.3399	21.7922	0.225854		8.24571	10.5647	32.5871	24.4898	0	47.9001	24.9201	12.0211	33.1551	27.5064	0.0145719	23.1844
26.192	25.6716		0.311223	17.8161	17.417	25.5	13.2757	23.3596	2.72636	2.36859	0.0761795	15.9389	9.39205	22.6933	1.30478	0.117257	2.42905	13.0122	9.20743	20.1954		0.302115	2.34126
25.3181	19.7658	25.2869	0.803213	5.1353		21.7352	24.3152	30.5211	0.250479	26.378	10.4925	20.1597	34.1709	27.4419	0.254726	40.9029	11.1342	15.2789	42.7873	27.1335	0.0395796	59.2944	8.8535
26.2508	28.9685	26.766	0.0948236	1.39594		24.1413	20.4997	25.4185	0.0349065			12.7795	16.2416	33.0783	0.0270116				17.5902	35.3206	0.0330149
33.0339				0.731886		25.7143	32.2418			3.11912		21.3873	29.1566			1.31088		13.3904	34.2038			1.7223
18.6386			0.0505362			20.062			0			15.5715			0.0194515			14.2279			0
21.9671			40.9951			30.8511			8.49345			36.3416			18.2109			32.5893			10.5257
			0.675024			23.1487			0.417646			30.3191			0.0392099			36.6412			0
20.3216			42.7614			20.4453			25.7705			17.9612			22.1501			24.0363			16.5412
14.4645						27.1927						21.4919						18.0838

## Sheet: Panel E
Table 1
1-month			1-month			2 months			2 months			3 months			3 months			4 months			4 months
High-precursor-1			Low-precursor-1			High-precursor-2			Low-precursor-2			High-precursor-3			Low-precursor-3			High-precursor-4			Low-precursor-4
1	2	3	1	2	3	1	2	3	1	2	3	1	2	3	1	2	3	1	2	3	1	2	3
34.6405	42.7461	32.0131	69.6277	12.6164	18.75	52.9158	38.1549	36.869	77.3447	77.957	9.5657	43.29	43.8966	40.5797	40.4535	21.0486	22.4199	42.8571	44.3127	44.044	47.2222	3.39223	19.7203
42.5158	37.7298	42.0322	44.5307	35.7257	37.6871		40.8719	46.1631	87.6519		12.996	36.2486	56.3413	35.4367	94.8767	1.87318	53.8409	33.9175		37.574	97.3342	2.85187	67.2269
35.894	39.16	42.9864	6.69903	23.5045	93.6893	30.3371	33.7722	33.9779		94.7931	98.8891	33.8496	35.5556	33.253	3.97456	95.5755	98.9254	40.3259	29.2842	37.3522	3.78629	94.3135	98.9408
34.9946	33.9709	29.9097	41.6667	14.831	11.1194	45.6598	43.6585	38.406	77.9615	61.1423	3.57143	43.4679	46.1398	36.4192	46.0145	95.5519	4.58115	39.675	54.6438	36.3636	41.9512	96.0618	3.68695
43.4783	34.5902	35.2963	59.8973	61.7978	36.9203	35.0072	38.5269	33.4302	54.1325	93.1337	2.06282	29.5652	56.2552	33.3333	47.7037	69.8225	1.72776	21.6774	64.0301	37.7724	42.0064	49.5495	1.36901
38.8813	37.777	30.0831	17.5861	1.22058	28.5474	46.2643	28.6615	40.562	17.404	1.81458	64.1948	55.3904	30.0995	42.8571	30.0119	52.07	61.5548	50.7266	33.9572	41.1311	33.179	76.7521	51.6949
33.3116	38.806		7.09979	1.72414	0.727603	36.25		37.2703	24.9875	2.56327	0.102448	50	66.251	42.1446	55.2024	0.46242	0.409103	49.6046	66.2252	46.6884		0.411975	2.94431
47.3919	39.2562	36.2088	91.7001	11.7124		44.4991	36.148	41.4392	97.2447	10.1655	0.382669	45.7086	36.1809	40.9302	96.5277	16.4159	1.72891	42.6728	32.2738	42.8884	99.1688	14.2469	0.700637
35.0877	39.2217	40.8296	0.705099	92.6396		36.0761	37.4787		0.421286			37.2619	43.4899	47.3957	0.630271				40.6365	46.5932	0.0969812
26.5377			25.1497	97.0969		34.0136	30.7305		6.23347	96.7892		50.4046	26.506		3.981	98.654		60.3348	23.0414		0.73193	98.2644
38.8979			31.8191			23.8659			11.9224			37.8335			17.7657			42.3339			6.58631
31.7683			5.02975			41.7553			1.55022			35.7359			38.6581			27.2321			80.296
			80.0386			25.982			69.1725			30.8511			20.8058			29.0076			6.2756
36.5497			5.96122			36.9264			61.3443			41.0194			70.8421			37.1882			78.1362
46.2448						43.6844						49.2958						50.0599

## Sheet: Panel F-1
Table 1
High-precursor			Low-precursor
1	2	3	1	2	3
15.6	14.6	17.2	10.7	0.88	4.83
15.5		7.6	2.15	44.1	4.95
12.6	18.4	11.3	4.49	0.54	0.093
17.5	13.6	18.9	0.6	1.25	41.5
19.5	11.7	10.7	6.42	0
14.1	12.3	12.2	59.6	0.06	0.62
20.8	11.5	12.2			2.67
20.2	10.2	13.7	0.72	19.5	14.2
	14.7	7.22	48.4
13.5	18.5	17.7	0	0.01
23.6
18			8.31
13.5			57.2
17.1			2.97
13.3

## Sheet: Panel F-2
Table 1
High-precursor			Low-precursor
1	2	3	1	2	3
13.2	5.13	5.16	12.1	53.8	0.91
7.88		13.5	0.23	3.25
16.7	14.2	15.2	0.084	0.28	0.62
7.74	9.89	11.2	0.59	2.37	1.08
15.8	5.49	15	26.3	0.56	0.023
4.55	12.4	10.7	0.013	21.9	2.23
7.24	4.31	7.44		0.22	0.066
7.34	17.5	12.4	0.036	43.7	1.39
	6.19	14.1	0.016
6.88	14.8			1.29
7.73			0
14.6			9.53
14.4			0
10.6			9.23
7.55

## Sheet: Panel F-3
Table 1
High-precursor			Low-precursor
1	2	3	1	2	3
21.6	15.7	17.6	20.4	1.92	1.41
12		12.7	86.9	1.39	20
19.8	13.5	15.8	0.18	13.6
16.6	28.3	17.2	0.86	88.3	1.63
9.77	30.6	15.6	23.7	0.55	0.94
19.2	12.7	16	29.6	72.5	3.05
27.6	31	17.2		0.3	0.083
20.5	13.2	19.6	90.2	10.5	0.11
	14.3	18.6	0.047
31	9.97		0.64	73.6
23			6.12
12.2			72.7
11.4			3.83
16.4			43.6
20.9

## Sheet: Panel F-4
Table 1
High-precursor			Low-precursor
1	2	3	1	2	3
50.4	35.43	39.96	43.2	56.6	7.15
35.38		33.8	89.28	48.74	29.75
49.1	46.1	42.3	4.754	14.42	67.313
41.84	51.79	47.3	2.05	91.92	44.21
45.07	47.79	41.3	56.42	1.11	68.663
37.85	37.4	38.9	89.213	94.46	5.9
55.64	46.81	36.84		72.82	2.819
48.04	40.9	45.7	90.956	73.7	15.7
	35.19	39.92	48.463
51.38	43.27		87.44	74.9
54.33			92.92
44.8			90.54
39.3			61.03
44.1			55.8
41.75

## Sheet: Panel G
Table 1
RFP% in Confetti+	RFP/(RFP+YFP)	RFP% in PB	CFP% in PB	YFP% in PB	Confetti% in PB	Y=X
2.82833	3.05143	2.68338	2.51397	2.82179	2.70221	2.82833
2.40801	2.33044	2.49014	2.41051	2.39887	2.58662	2.40801
2.05865	2.23907	2.03249	2.1417	2.5345	2.0282	2.05865
1.77685	1.91706	1.96996	1.84169	2.31807	1.83714	1.77685
3.13437	3.19304	3.26852	2.82178	2.93036	3.21013	3.13437
2.58922	2.96357	2.33529	2.57612	3.22458	2.46148	2.58922
2.37687	2.35848	2.38077	1.96692	2.21112	2.60893	2.37687
2.08119	1.98448	2.1586	1.5876	1.80205	2.0665	2.08119
2.92726	2.56787	3.10108	2.74077	2.20962	2.33386	2.92726
2.14023	2.22303	2.22236	2.40958	2.61819	2.53922	2.14023
2.13914	2.23283	2.24849	2.24609	2.5828	2.39436	2.13914
2.03783	2.07285	2.16203	2.09487	2.37888	2.38761	2.03783
1.44168	1.45898	1.43765	1.4125	1.19461	1.18456	1.44168
0.687072	0.918557	0.803705	0.754808	1.15666	0.703993	0.687072
0.572831	0.788237	0.598652	1.01354	0.928155	0.699972	0.572831
0.475557	0.677059	0.46359	0.889048	0.657904	0.685881	0.475557
1.83907	1.6783	2.01734	1.06154	1.60058	0.934448	1.83907
0.683121	1.01285	0.668823	0.384275	2.16328	0.537985	0.683121
0.599489	0.824983	0.598297	0.421447	0.869231	0.514185	0.599489
0.563161	0.783716	0.539283	0.596054	0.725061	0.506145	0.563161
1.18618	1.30719	1.63293	0.74751	1.20681	1.05336	1.18618
0.89772	1.11684	1.31368	0.844731	1.20747	1.05471	0.89772
1.00688	1.25318	1.0366	0.870571	1.35425	1.32577	1.00688
1.09319	1.36208	1.11742	0.929346	1.46114	1.43441	1.09319
1.86157	2.17408	2.27392	1.75087	2.11014	1.90427	1.86157
2.10973	2.36488	2.44642	2.29441	2.54984	2.33879	2.10973
1.80343	1.88074	2.25259	2.35843	1.75651	2.00263	1.80343
1.82025	1.60449	1.71393	1.79102	1.71851	1.88359	1.82025
2.22352	2.51805	1.40351	1.53589	1.88932	1.10794	2.22352
2.96272	1.82451	2.46263	1.8173	1.81074	2.41668	2.96272
2.10272	1.88681	2.33232	2.26711	1.95009	1.96766	2.10272
1.9542	1.83069	2.36918	1.8915	1.84647	1.87614	1.9542
1.32313	1.52084	1.03983	1.80096	1.98353	1.04799	1.32313
1.98109	2.00612	1.9902	2.06476	2.42646	2.19836	1.98109
1.93014	2.03774	1.95544	2.22002	2.47255	2.42605	1.93014
1.93564	2.25387	2.20428	1.61173	2.47955	2.6259	1.93564
1.0607	1.05585	1.33738	0.973026	0.417909	0.669293	1.0607
0.804936	0.931164	1.31634	0.690138	1.03282	0.836642	0.804936
0.614433	0.808739	0.717491	0.70313	0.946663	0.716449	0.614433
0.478964	0.595904	0.439371	0.953281	0.630398	0.714745	0.478964
0.94083	0.937133	0.763369	2.03213	2.15141	0.196846	0.94083
0.756609	0.676733	0.788981	1.22173	0.944457	0.528641	0.756609
0.610606	0.638956	0.36485	0.593055	0.906412	0.567578	0.610606
0.501936	0.488547	0.324188	0.48828	0.711455	0.471802	0.501936
1.29498	1.89645	1.54778	0.353424	1.93635	0.370215	1.29498
0.94995	1.19575	1.35896	1.00448	1.26654	0.716438	0.94995
0.971604	1.09134	0.857095	1.12824	1.53109	1.18062	0.971604
1.07036	1.2457	1.0489	1.45604	1.84436	1.25208	1.07036
2.68947	2.44154	2.75252	2.46855	2.43115	3.13726	2.68947
2.06088	2.20713	2.10594	1.96515	2.49845	1.882	2.06088
2.06674	1.90724	2.30919	1.88245	2.11109	1.88287	2.06674
2.12032	1.89938	2.09685	1.5999	1.76419	1.82017	2.12032
2.74514	2.58887	2.55613	2.9379	2.61979	2.51649	2.74514
2.29676	2.40873	2.55608	2.3917	2.14897	2.32399	2.29676
1.88809	1.93004	2.24418	1.44239	1.84408	1.97424	1.88809
1.88492	1.82133	2.14052	1.32141	1.56993	1.84792	1.88492
2.53825	2.37824	2.56568	2.30502	2.59729	2.63476	2.53825
2.57391	2.2503	2.65231	2.59032	2.42359	2.63182	2.57391
2.08751	1.93752	2.04981	2.32761	2.17897	2.3608	2.08751
1.91185	1.71242	1.83704	2.54348	1.93846	2.14457	1.91185
0.806547	0.981569	0.785235	0.955136	1.01584	0.871238	0.806547
0.491234	0.865179	0.345129	0.620981	1.05658	0.675096	0.491234
0.548548	0.863977	0.467242	0.600079	0.870434	0.55787	0.548548
0.347321	0.688093	0.4057	0.255901	0.839971	0.362302	0.347321
0.809826	0.984775	0.796626	0.91085	1.12323	0.973708	0.809826
0.539273	0.793044	0.692431	0.879208	0.88645	0.392138	0.539273
0.358368	0.722169	0.283415	0.23355	0.575907	0.325803	0.358368
0.282644	0.674698	0.476362	0.172823	0.443643	0.360689	0.282644
0.858987	0.994382	0.737968	0.884252	1.31799	0.703603	0.858987
0.740001	1.24941	0.773257	1.21193	1.56056	1.02284	0.740001
0.702176	1.30295	0.801113	1.06579	2.15597	0.578377	0.702176
0.643812	0.951219	0.611521	0.860832	2.17533	0.458321	0.643812
