# Supplementary material for: Dynamic tracking of native precursors in adult mice
Source: eLife. 2024 Dec 5;13:RP97504. doi: 10.7554/eLife.97504 (PMC11620740; doi:10.7554/eLife.97504)
Supplement: Figure 2—figure supplement 4—source data 1. [file elife-97504-fig2-figsupp4-data1.xlsx]

## Sheet: Panel A
Table 1
MP			MP			LSK			LSK			LT-HSC			LT-HSC			ST-HSC			ST-HSC			MPP2			MPP2			MPP3			MPP3			MPP4			MPP4
High-precursor-1			Low-precursor-1			High-precursor-2			Low-precursor-2			High-precursor-3			Low-precursor-3			High-precursor-4			Low-precursor-4			High-precursor-5			Low-precursor-5			High-precursor-6			Low-precursor-6			High-precursor-7			Low-precursor-7
1	2	3	1	2	3	1	2	3	1	2	3	1	2	3	1	2	3	1	2	3	1	2	3	1	2	3	1	2	3	1	2	3	1	2	3	1	2	3	1	2	3
39.924	59.0489	78.8787	45.1289	0.0060041	2.8621	46.6179	53.6343	84.8416	17.7019		14.6667	82.4742	40.205	98.0224	0.30592			57.4627	59.5702	96.0591	2.86502	0		47.8652	49.1762	85.5438	18.3168		20.7921	49.345	61.0895		29.5559	0	15.3846	32.6316	58.8785	78.341	55.6485	0.168634	10.2902
54.8156	44.4685	32.825	99.828	95.2381	25	53.3764	37.5661	37.6942	97.8495	71.4286	9.26276	55.1839	24.1958	37.5796	100	0	0	60.5795	46.9613	45.3594	100			54.342	46.875	36.2296	91.5385	33.3333		52.3035	49.2318	40.5405	100	100	33.3333	52.5654	40.7286	36.1426	97.8406	75.2294	0
34.0483	42.3341	36.0656	93.9261	99.9108	99.9765	39.0313	37.2263	43.5057	78.9474	99.0847	99.8432	61.2443	28.8462	45.9149		92.1739	100	57.2469	50.783	63.7563		100	100	42.5532	24.8882	48.7728	57.047	98.2003	100	49.5619	51.3621	45.9342	69.8529	99.8797	100	29.8643	38.8963	36.7164	87.0787	99.6808	99.377
66.1187	52.4246	47.5066	100	65.8683	92.452	73.2527	47.6575	49.4388	77.9014	100	90.5133	92.5254	28.9096	42.7136		100	95.7447	94.0261	63.9439	53.3444	100		94.7526	70.348	39.8844	55.3073	100		90.5573	79.7443	53.5027	49.1176	100		87.8623	60.8519	50.0496	47.3545	33.3333	100	85.3659
33.7553	61.5333	20.5967	12.2864	0.590551	100	29.207	62.9371	18.5012	8.65594	0.23536	100	12.0995		20.1878	32.5	0.0983195	100	14.9895	82.4418	17.8082	42.246	0	100	37.1648	68.7332	20.3248	12.4726	1.60428	100	32.7623	71.7839	21.7846	14.7221	0.629811	100	35.4298	41.3094	18.1074	5.63798	0.684932
63.7931	28.424		99.993	75	0.149202	63.0952	31.4607	34.2697	100	100	0.214471	49.3601	30.0567	32.9193	100		0	70.273	34.6624	34.2618	100		0	67.8484	28.9973	43.2432	100	100	0	62.9773	32.3256	35.7798	100	100	0.264067	65.9204	30.3	32.8205	100		0.220724
69.2875	68.5279	41.4439	98.472	0	99.7368	72.6225	68.2327	43.1738	98.7671	0.0866349	100	51.9386	63.7004	46.4883	100		100	70.0043	57.7684	30.5015		0	100	74.7001	72.2543	42.6213	92.5926	0	100	80.747	61.6988	39.562	100	0.433469	100	76.9231	72.6667	42.8571	100	0	100
69.697	27.5488	52.4862	65.3983	99.9964		61.9122	25.5319	56.7533	100	100		30.4167	25.098	70.1754	100	100		56.9307	45.5446	52.2682		100		72.1154	28.0632	53.1987	100	100		75.7465	29.1553	50.7339	100	100		73.3114	23.0068	54.8173	100	100
84.8939	30.621	12.468	99.9961			63.285	30.3571	11.7787	100			22.9721	14.9231	13.1064	100			81.6641	29.3839	15.7171	100			86.1619	29.3436	15.0699	100			80.1123	35.3116	11.0139	100			83.9416	44.5769	9.15476	100
62.7323						59.1039						62.6667						73.5294						76.9231						58.7925						44.9786
49.2843			100			48.7859			99.8687			45.4545			100			47.6395			100			55.8704			100			56.1586			100			46.1538			100
27.9817			28.2876			24.6305			30.2036			27.5688			24.7265			18.552			13.1498						23.1188						29.8887			24.5283			47.0337
44.546			99.9925			50.9101			99.9602			45.7111			99.9643			48.8048			100			50.8919			99.7836			51.627			100			50.9781			100
63.7363			17.7765			62.9349			15.8572			56.4693			14.0973			55.7809			6.63391			69.4444			23.443			59.97			21.2903			65.3237			10.9208

## Sheet: Panel B
Table 1
Average of biological replicates	High precursor numbers			Low precursor numbers
LK	98.8214	99.4778	99.6333	89.2071	95.8125	99.4857
LSK	97.9071	98.4889	98.5	85.8714	87.4	97.8
LT-HSC	96.7929	98.4333	97.1222	80.2	70.1375	97.3714
ST-HSC	98.6643	99.2778	98.5889	87.4214	90.6	98.4571
MPP2	97.5857	97.2444	97.9444	87.5714	86.2125	96.2571
MPP3	98.5071	99.1889	99.2111	87.8143	93.15	98.3429
MPP4	98.7	99.0778	99.1222	88.0429	94.6	98.5286
CMP	98.4429	98.5778	99.49	88.7429	94.5875	99.2714
GMP	97.9929	98.9222	99.72	88.5143	96.5875	99.3429
MEP	97.4714	97.8111	99.79	88.6357	93.7125	99.9143
All data points	High precursor numbers																																			Low precursor numbers
LK	99.7	99.8	99.6	99.7	99.7	99.8	99.7	99.9	99.7	99.7	98.6	93.3	99.3	95	99.9	99.7	99.4	99.8	99.6	99.4	99.1	99.1	99.3	99.5	99.6	99.5	99.5	99.6	99.8	99.8	99.6	99.8				99.7	99.5	99.4	99.6	99.7	99.8	99.7	99.2	99.6	95.1	43.6	72.9	82.7	58.4
LSK	99.6	99.8	99.8	99.8	99.7	99.8	99.7	99.8	99.3	99.3	96.4	84.2	98.4	95.1	99.6	99.3	98.9	99.6	99.1	98.2	97.1	97.1	97.5	97.8	98.6	97.9	98.2	98.5	99	99	98.3	99.2				99.7	99.5	99.3	99.2	99.8	99.8	99.7	98.1	98.5	77.8	27.8	78.4	75.4	49.2
LT-HSC	99.8	100	99.9	100	99.4	100	99.9	99.9	99.6	99.4	98	66	98.3	94.9	99.6	99.3	99.5	99.7	99.4	97.5	97.1	96.8	97	96.9	96.9	94.9	96.8	97.4	96.9	98.2	97.8	98.3				99.9	99.7	99.6	95	99.9	99.9	99.8	99.1	99.1	33.7	22.7	73.4	66.3	34.7
ST-HSC	100	100	99.9	100	99.8	99.6	100	100	100	99.6	98.4	88.5	99.7	95.8	99.9	99.6	99.8	99.9	99.4	98.9	98.8	98.2	99	98.6	97.8	97.5	98.1	98.2	98.4	99.7	99.4	99.6				100	100	99.4	100	100	100	98.9	99.1	100	94.6	38.9	87.7	63.3	42
MPP2	99.9	99.9	99.8	99.9	99.9	99.9	99.9	99.8	98.7	98.8	91.4	86.9	97.9	93.5	99.3	99.4	98.6	99.2	98.2	96.8	95.6	94.2	93.9	96.7	99.1	98	98.4	98.4	98.9	97.4	96.3	98.3				99.7	99.5	99.4	99.5	99.8	99.6	99.8	96.1	96.6	86.9	34.1	86.3	76.4	52.3
MPP3	99.9	99.8	99.9	99.9	99.9	99.9	99.7	100	99.6	99.6	97.1	90.2	98.9	94.7	99.9	99.9	99.5	99.8	99.2	99	98.2	98.6	98.6	98.6	99.5	99.2	99.2	99.4	99.4	99.2	98.9	99.5				99.7	99.8	99.6	99.5	99.9	99.7	99.8	98.7	99.2	93.6	18.5	83.9	80.7	56.8
MPP4	99.8	99.9	99.9	99.9	99.9	99.8	99.7	99.8	99.5	99.7	96.8	91.9	99.2	96	99.9	99.8	99.5	99.8	99.5	98.6	98	98	98.6	98.6	99.4	99	99.2	99.2	99.4	99.1	98.7	99.5				99.8	99.6	99.5	99.9	99.9	99.8	99.8	98.5	99.4	93.8	18.8	75.5	91.7	56.6
CMP	99.4	99.5	99.5	99.3	99	99.3	98.1	98.9	99.5	99.3	97.6	98.5	92.8	97.5	94.5	99.8	99.7	99.5	99.4	99.6	97.7	98.9	98.1	98.5	99.6	99.8	99.7	99.8	99.8	99.6	99.6	99.1	99.4			99	99.3	98	99.7	96.3	98.7	98.9	99	99.2	94.3	41.6	75	84.6	58.8
GMP	98.7	99.1	99	99	97	98	94.4	98.3	99.7	99.1	99	98.6	93.2	98.8	96.1	99.5	99.6	99.1	99.1	98.9	99.4	99.4	99.2	99.6	99.8	99.9	99.8	99.9	99.9	99.9	99.4	99.2	99.8			98.4	98.8	98.2	99.1	92.5	98.1	98.3	99.2	99.4	96.9	36.5	74.5	87.7	61.6
MEP	99.6	99.5	99.6	99.6	99	99.7	99.4	99.4	96.3	98.4	96.4	97.8	88.7	91.2	90.3	99	99.6	98.8	98.8	99.5	98.2	98.5	97.6	98.8	99.9	100	100	99.8	100	100	100	99.7	99.7			99.2	99.3	99.2	99.7	99	99.4	99.3	96.8	95.3	91.3	54.1	81.2	76.8	50.3
[truncated: 15 more columns]

## Sheet: Panel C
Table 1
High	Low
44100000	52000000
67500000	71500000
79000000	55000000
49450000	45300000
50500000	44500000
54000000	51500000
68000000	58500000
71000000	54000000
43150000
50500000	46050000
57500000	49000000
48350000	35800000
44000000	55500000
44650000	42450000
45650000	52000000

## Sheet: Panel D
Table 1
All data points	High precursor numbers																																			Low precursor numbers
LT-HSC	1.76	1.33	1.75	1.73	1.6	1.08	1.79	1.72	1.89	1.54	1	1.11	1.36	1.18	1.43	1.76	1.34	1.28	1.14	1.18	0.91	0.9	0.91	1.07	1.76	1.38	0.88	1.15	1.36	1.51	1.18	1.53				2.52	0.53	0.28	0.61	2.74	3.41	1.49	1.36	1.21	0.47	1.04	1.82	2.35	0.6
ST-HSC	0.26	0.4	0.5	0.45	0.42	0.32	0.26	0.2	0.51	0.29	0.43	0.69	0.4	0.36	0.49	0.82	0.77	0.72	0.55	0.52	0.3	0.26	0.3	0.38	0.35	0.45	0.32	0.45	0.87	0.49	0.48	0.69				0.078	0.31	0.054	0.26	0.19	0.35	0.06	0.3	0.17	0.4	0.22	0.34	0.18	0.15
MPP2	0.86	0.72	0.78	1.18	1.11	1.02	1.34	1.21	0.9	1.41	0.44	0.44	1.06	0.85	1.08	0.86	0.58	0.86	0.83	1.06	0.79	0.58	0.63	0.98	2.93	1.02	1.09	1.2	0.96	1.81	1.67	1.86				1.11	1.25	1.42	0.93	1.11	1.41	1.34	0.84	1.05	0.36	0.92	1.22	0.49	0.65
MPP3	1.34	1.36	1.39	1.96	2	1.78	1.82	1.51	1.69	2.11	0.94	0.99	1.69	1.91	2.38	1.56	1.76	1.88	1.66	2.1	1.4	0.88	1.22	2.13	3.48	1.87	1.65	1.86	3.59	2.4	2.11	2.8				1.5	1.86	1.47	1.57	1.6	1.67	1.55	1.46	1.46	0.77	0.84	1.84	0.72	1.07
MPP4	4.58	3.96	3.67	4.66	4.38	3.8	4.31	4.17	3.69	4.27	2.03	1.93	3.85	2.32	3.64	3.41	1.69	2.8	2.9	3.22	2.15	1.5	1.73	3.55	8.87	3.8	4.01	5.04	4.48	5.04	4.25	4.71				2.23	5.5	1.96	3.14	2.61	2.71	3.08	1.56	2.3	1.6	0.32	2.18	1.58	1.87
Average of biological replicates	High precursor numbers			Low precursor numbers
LT-HSC	1.48857	1.20556	1.31333	1.45929	1.21738	1.26857
ST-HSC	0.392143	0.525556	0.497778	0.218714	0.142125	0.395571
MPP2	0.951429	0.807778	1.50222	1.00714	0.7425	1.66714
MPP3	1.60643	1.64889	2.43222	1.38429	1.305	2.39429
MPP4	3.68714	2.56	4.86111	2.33143	1.72125	3.16857
[truncated: 15 more columns]

## Sheet: Panel E
Table 1
All data points	High precursor numbers																																			Low precursor numbers
LSK	10.2	8.91	9.33	11	10.5	8.66	10.4	9.75	9.68	10.6	5.82	6.18	9.64	6.99	9.41	9.51	6.53	7.96	7.43	8.74	6.16	4.61	5.3	8.82	18.7	9.62	9.22	11	11.7	12.9	11.1	13.1				7.73	10.7	5.53	7.02	8.75	10.4	7.84	5.87	6.55	4.35	3.54	7.79	5.66	4.72
CMP	4.93	5.99	6.21	5.69	5.9	4.96	4.83	5.07	9.57	7.7	7.11	7.04	11.8	3.58	4.3	9.67	8.98	12.2	10.9	8.83	12.6	10.7	10.6	11.6	7.1	7.33	7.1	7.31	7.21	7.77	9.54	8.65	8			4.2	6.19	3.96	4.86	4.12	5.05	5.2	7.94	7.31	10.3	5.59	9.13	8.11	7.44
GMP	7.99	6.98	7.87	7.99	6.45	7.63	6.72	7.91	8.41	9.27	6.35	6.93	13.8	1.87	2.5	15.3	12.1	14.1	14.3	15.3	13	15.2	13.9	12.8	10.8	10.6	8.5	10.7	10.8	11.2	12.6	10.7	9.78			7.29	7.08	6.08	5.61	6.95	7.1	7.84	6.69	5.28	7.38	4.7	5.52	10.3	12.5
MEP	3.06	3.06	2.24	4.22	3.9	3.38	3.57	4.46	3.97	2.72	4.32	2.24	5.31	2.39	2.67	4.49	5.89	4.52	4.43	4.9	10.7	4.85	4.39	7.09	4.63	8.9	4.03	4.17	3.27	4.27	4.19	5.05	4.73			4.07	5.27	5.2	3.85	3.85	5.26	4.64	1.57	4.92	4.67	3.5	5.23	5.03	3.25
Average of biological replicates	High precursor numbers			Low precursor numbers
LSK	9.11857	7.29444	11.7956	6.88929	5.24625	9.57429
CMP	6.45571	9.86444	8.161	6.38571	8.21375	9.83143
GMP	7.58357	12.8556	10.848	7.16571	13.7625	11.84
MEP	3.48857	5.20444	5.033	4.30786	5.54625	5.45286
[truncated: 15 more columns]
