# Supplementary material for: Dynamic tracking of native precursors in adult mice
Source: eLife. 2024 Dec 5;13:RP97504. doi: 10.7554/eLife.97504 (PMC11620740; doi:10.7554/eLife.97504)
Supplement: Figure 2—source data 1. [file elife-97504-fig2-data1.xlsx]

## Sheet: Figure 2C
Table 1
Figure 2C	High-precursor			Low-precursor			High-precursor			Low-precursor			High-precursor			Low-precursor			High-precursor			Low-precursor
	1	2	3	1	2	3	1	2	3	1	2	3	1	2	3	1	2	3	1	2	3	1	2	3
	32.6797	32.092	28.6648	21.5395	69.8324	70.9559	24.406	45.8428	38.5706	17.7832	11.6935	60.4728	31.8182	43.2952	38.8889	47.4105	2.62143	57.1767	30.9524	41.208		24.7685	1.55477	67.5524
	39.3535	37.7298	35.5629	9.56839	23.126	46.5306		37.8065	31.4748	11.6663		64.9802	43.4407	19.5456	26.3289	4.82685	91.8551	22.8052	43.8101			2.40815	90.4801	16.6387
	39.584	42.5653	33.6134	92.233	18.7951	46.5306	30.5618	44.648	31.4917		4.33912	0.479198	27.8761	33.0864	27.9518	91.256	3.79006	0.221239	25.6619	39.9132	43.043	94.4468	3.7448	0.138161
	39.7255	38.5384	34.6501	37.4294	17.5573	2.20874	29.8545	31.7073	37.2509	9.34863	22.5999	92.8571	34.8698	32.4349	41.5883	21.6184	1.79023	90.5759	41.826	26.2599	22.4852	29.2683	1.35988	93.8702
	30.8764	37.3948	30.2799	27.1535	31.236	34.0299	34.9713	34.8442	35.1744	15.8128	6.4524	97.8174	39.4203	26.4484	30.7494	15.2593	20.1183	98.1754	43.266	24.4821	26.7139	11.3789	0	98.5975
	36.4939	35.5249	44.0592	78.569	0.959024	62.8095	37.49	44.9986	37.6458	82.3701	0.0638462	27.5595	34.0449	37.3134	32.6531	69.9881	0.0299376	13.525	37.2523	32.8877	39.9577	66.8064	0.063519	10.5085
	40.4964	35.5224		92.589	80.4598	62.3426	38.25	28.9929	39.3701	72.2861	95.0681	99.8214	34.0611	24.357	35.1621	43.4928	99.4203	97.1619	37.3832	24.5674	25.908		99.2859	94.7144
		40.978	38.5043	7.49665	83.1523		33.7657	39.5369	28.0397	2.50479	63.4565	89.1248	34.1317	29.6482	31.6279	3.21759	42.6813	87.1369	42.0483	24.9389	31.3625	0.791592	26.4586	90.4459
	38.6615	31.8098	32.4044	99.2001	5.96447		39.7826	42.0216		99.5438			49.9586	40.2685	19.526	99.3427				41.7732	33.1162	99.87
	40.4285			10.7784	2.17126		40.2721	37.0277		0.453343	0.0916443		28.2081	44.3373		0.0631469	0.035137		26.2748	42.7548	29.9781	0	0.0133511
	42.4635			68.1303						88.0776			46.595			82.2149			43.4382		18.0862	93.4137
	46.2646			53.9751			27.3936			89.9563			27.9225			43.131			40.1786			9.17826
				19.2864			50.8693			30.4098			38.8298			79.155			34.3511			93.7244
	43.1287			51.2774			42.6283			12.8852			41.0194			7.00783			38.7755			5.32258
	39.2907						29.1229						29.2123						31.8563

## Sheet: Figure 2D
Table 1
B cell		High-clone			Low-clone
	1	2.82833	3.13437	2.92726	1.44168	1.83907	1.18618
	2	2.40801	2.58922	2.14023	0.687072	0.683121	0.89772
	3	2.05865	2.37687	2.13914	0.572831	0.599489	1.00688
	4	1.77685	2.08119	2.03783	0.475557	0.563161	1.09319
T cell		High-clone			Low-clone
	1	1.86157	2.22352	1.32313	1.0607	0.94083	1.29498
	2	2.10973	2.96272	1.98109	0.804936	0.756609	0.94995
	3	1.80343	2.10272	1.93014	0.614433	0.610606	0.971604
	4	1.88492	1.91185	1.93564	0.282644	0.643812	1.07036
Myeloid cells			High-clone			Low-clone
		1	2.68947	2.74514	2.53825	0.806547	0.809826	0.858987
		2	2.06088	2.29676	2.57391	0.491234	0.539273	0.740001
		3	2.06674	1.88809	2.08751	0.548548	0.358368	0.702176
		4	2.12032	1.88492	1.91185	0.347321	0.282644	0.643812

## Sheet: Figure 2E
Table 1
RFP% in Confetti+	YFP% in Confetti+	CFP% in Confetti+	Y=X
2.82833	3.09021	2.48228	2.82833
2.40801	2.37508	2.53087	2.40801
2.05865	2.18284	2.05038	2.05865
1.77685	1.99395	1.72914	1.77685
3.13437	2.97935	2.84382	3.13437
2.58922	3.14056	2.69929	2.58922
2.37687	2.11983	1.90543	2.37687
2.08119	1.75887	1.58757	2.08119
2.92726	2.4224	2.75795	2.92726
2.14023	2.45787	2.50742	2.14023
2.13914	2.47467	2.39042	2.13914
2.03783	2.22159	2.1704	2.03783
1.44168	1.1744	1.20592	1.44168
0.687072	0.708564	0.747492	0.687072
0.572831	0.622754	0.667116	0.572831
0.475557	0.550176	0.594205	0.475557
1.83907	1.754	1.23999	1.83907
0.683121	1.53229	0.667771	0.683121
0.599489	0.551953	0.564622	0.599489
0.563161	0.541241	0.561807	0.563161
1.18618	1.15159	0.904244	1.18618
0.89772	1.02305	0.834951	0.89772
1.00688	1.15993	0.924961	1.00688
1.09319	1.30444	0.992526	1.09319
1.86157	2.08237	1.96727	1.86157
2.10973	2.35832	2.36273	2.10973
1.80343	1.87828	2.47376	1.80343
1.82025	1.60891	1.74275	1.82025
2.22352	2.09913	1.94967	2.22352
2.96272	1.6211	1.76707	2.96272
2.10272	1.88558	2.47262	2.10272
1.9542	1.81381	1.96502	1.9542
1.32313	1.68988	1.36174	1.32313
1.98109	2.25426	2.20969	1.98109
1.93014	2.24706	2.12501	1.93014
1.93564	2.60313	2.31036	1.93564
1.0607	1.53299	1.14028	1.0607
0.804936	0.692972	0.808251	0.804936
0.614433	0.552213	0.660201	0.614433
0.478964	0.414819	0.510962	0.478964
0.94083	1.50102	1.04513	0.94083
0.756609	1.24127	0.814246	0.756609
0.610606	0.549359	0.601484	0.610606
0.501936	0.427349	0.467201	0.501936
1.29498	1.08637	1.01131	1.29498
0.94995	1.41899	1.05292	0.94995
0.971604	1.5055	1.00997	0.971604
1.07036	1.77672	1.07699	1.07036
2.68947	2.36767	2.37737	2.68947
2.06088	2.48005	1.96815	2.06088
2.06674	1.80186	1.99539	2.06674
2.12032	1.67648	1.68955	2.12032
2.74514	2.64209	3.02919	2.74514
2.29676	2.21388	2.45939	2.29676
1.88809	1.73683	1.56788	1.88809
1.88492	1.48069	1.38146	1.88492
2.53825	2.26716	2.47026	2.53825
2.57391	2.41657	2.57407	2.57391
2.08751	1.98585	2.41009	2.08751
1.91185	1.80529	2.55337	1.91185
0.806547	0.996091	0.844592	0.806547
0.491234	1.04261	0.568492	0.491234
0.548548	0.971526	0.657681	0.548548
0.347321	0.820191	0.446659	0.347321
0.809826	0.767497	0.724354	0.809826
0.539273	1.3283	0.476625	0.539273
0.358368	0.585145	0.417571	0.358368
0.282644	0.461693	0.348647	0.282644
0.858987	1.5825	0.699213	0.858987
0.740001	1.3484	0.636609	0.740001
0.702176	1.48699	0.731679	0.702176
0.643812	1.63013	0.702019	0.643812

## Sheet: Figure 2F
Table 1
	high-clone			low-clone
LT-HSC	1.1741	1.39476	1.08043	0.617247	0.380247	0.425935
ST-HSC	1.16956	1.52299	1.08728	0.556971	0.263126	0.385918
MPP2	1.51383	1.30266	1.28649	0.742995	0.621467	0.59231
MPP3	1.56715	1.65801	1.59142	0.76765	0.385157	0.770513
MPP4	1.32849	1.66437	1.26017	0.680408	0.424902	1.1849
LSK	1.52083	1.54068	1.23003	0.718801	0.639097	0.722829
MP	1.41335	1.52877	1.25077	0.731725	0.577889	0.702445
CMP	1.36943	1.44157	1.59125	0.669473	0.321167	0.643493
GMP	1.36346	1.57015	1.59002	0.623722	0.485183	0.699575
MEP	1.40888	1.54163	1.27043	0.63142	0.2888	0.6137
PB-myeloid	2.12032	1.88492	1.91185	0.347321	0.282644	0.643812

## Sheet: Figure 2G
Table 1
All data points		Low precursor numbers																																													High precursor numbers
	1	81.643	73.4423	64.7358	88.7652	79.898	81.2942	68.5427	77.4975	73.913	78.191	72.166	71.4718	60.2227	66.0263		71.4863	65.5838	73.34	73.3536	57.1728	80.6484	66.0455	56.5749	59.5335	73.1282						75.5802	73.6097	83.6198	79.4534	80.7847	77.8226	71.9697									90.7171	88.5743	89.257
	2	92.9044	90.9274		91.3746	90.7891	85.0731	87.5627	90.6172	90.0802	88.5859	76.9231	74.723	83.1288	82.5076		88.3651		91.2284	84.1016	79.7694	92.334	77.2727	52.0202		89.1566						89.9396	91.9875	93.7312	91.2838	94.9552	92.4733	91.443	93.2289								95.5704	95.2951	92.9714
	3	95.2763	94.6232	85.6713	94.4987	94.4154	94.5824	91.3292	85.9813	93.0327	93.3266	80.7887	76.1329	89.3574	86.5191		93.5107	87.5883	93.7531	93.6179	92.2379	94.5009	89.5749	53.0256		93.8546						94.8311	83.9594	95.6434	92.7729	96	93.6239	94.5864	95.0061								96.6252	95.2094	96.0883
	4	96.3589	95.8421	95.2142	97.5218	97.7451	97.1354	96.0646	95.7232	95.6933	94.551	83.5866	74.5968	91.7237	87.6133		94.5725	87.9469	95.479	94.7689	94.9011	95.835	90.9487	51.7782		96.0584						95.9555	84.3621	95.0964	95.4298	96.3196	95.0559	94.0513	95.9321								97.6613	97.2278	96.4727
Average of biological replicates		Low-precursor (14,8,7)			High-precursor (14,9,9)			Chimerism difference
	1	74.1292	67.6867	77.5486	74.1292	90.0672	91.6137	15.4859	22.3805	14.0651
	2	86.5536	81.781	92.3803	94.2676	94.0959	95.9403	7.71401	12.3149	3.55993
	3	89.6811	87.9627	93.3029	96.1903	97.0626	96.8829	6.50919	9.09993	3.58
	4	92.8121	89.1432	94.0253	97.2519	97.8057	97.5028	4.43975	8.66248	3.47743
[truncated: 32 more columns]

## Sheet: Figure 2H
Table 1
All data points		Low precursor numbers																																													High precursor numbers
1	1	53	48.2	12.2	23	41.5	32	62.1	34.2	48.3	48.1	27	33.8	54.2	38.7		87.6	49.5	78.3	70.5	74.9	73.1	66.1	51.9	70.8	63.8						77.8	72.3	39.1	56.2	71.9	37.1	59.9									24.6	24.2	26.6
2	2	20.6	24.4		15.2	15	23.5	27.4	17.6	17.7	13.7	11.3	24	23	17.3		24.7		17.4	26	24	35.6	35.7	14.4		23						20.4	13.6	14.8	17.3	21.5	22.3	24	15.8								19.8		15.6
3	3	16	26.5	30.5	22.3	18.1	17.7	28.5	28.4	13.9	16.5	16.7	14.7	15.7	14.3		14.5	14.2	12.7	24	17.4	17	32.1	6.91		27.1						21.6	7.66	18.9	23.9	19.5	19.4	15.6	14.2								21.9	23.8	20.9
4	4	20	24.4	18.2	20.7	17.1	19.5		21.1	16.1	21.3	14	17	16	17.4		15.5	18.3	12.6	28.6	19.7	15.9	32.8	14.4		24.2						18.9	7	21.9	18.4	25	22.3	26.5	15.2								19.9	19.9	17.6
Average of biological replicates
	Low precursor numbers			High precursor numbers
1	39.7357	68.65	59.1857	28.6	26.5222	35.7625
2	19.2846	25.1	18.7125	16.5643	23.69	16.4444
3	19.9857	18.4344	17.595	17.3333	19.53	19.13
4	18.6769	20.2222	19.4	18.8286	18.5111	18.69
[truncated: 32 more columns]
