# Supplementary material for: Dynamic tracking of native precursors in adult mice
Source: eLife. 2024 Dec 5;13:RP97504. doi: 10.7554/eLife.97504 (PMC11620740; doi:10.7554/eLife.97504)
Supplement: Figure 3—figure supplement 1—source data 1. [file elife-97504-fig3-figsupp1-data1.xlsx]

## Sheet: Panel A
Table 1
14 days
44.56
58.9
39.29
42.8
47.4

## Sheet: Panel B
Table 1
		Myeloid cells
	1	27.6596	41.129	32.9524	38.2609	32.7273	34.489	39.4469	34.9206	31.8182	33.8144	34.2007	35.3571	30.8394		35.1648	33.7711	33.7891	32.2339	34.4828	26.1029	30.5328	33.9731	34.5771	23.4719	15.7895	39.1481	35.5114	35.6282	34.5733	36.8132	36.2782	39.5901	32.4286	34.3885	30.0435	34.7889	37.3219	27.2894	33.7969	36.9792	34.7973	25.5682	35.6604	28.0919	29.2308	37.5505	34.0037	32.8
	2	26.5217	37.3626	40.0872	38.2306	31.0569	35.9447	33.3333	35.9596	35.8527	37.7282	43.0894	37.9661	17.4204		36.514	27.8633	35.7143	20.1117	33.655	12.9376	18.9836		27.5689	11.3861		39.2157	35.8289	28.9973	14.6739	38.324	33.6032	33.1204	29.7998	37.7399	30.1129	37.3467	35.3609				27.8106	1.89394	38.9351	25.6662	5.65217	38.6163	39.2989	37.8981
	3								35.4788	33.7243	39.1181	42.1965	37.1571	15.3226		33.0827	25.832	36.5276	21.3855	36.9361	8.26245	12.1127	26.2217	21.6891	5.02693	0.517114	38.5047	42.5208	29.1152	13.0293	39.5701	35.703	38.5301	35.9888	37.1817	21.9653	36.0921	39.1375	12.3967	30.4629	41.4545	22.0228	0.31881	38.695	22.8525	1.42077	35.2163	35.5903	37.4608
	4	14.521	38.7716	40.1496	39.8069	32.7526	36.969	37.1321	39.418	37.1779	43.445	41.5842	41.6517	11.6474		33.6273	29.2614	39.4111	20.4334	38.9199	9.34211	7.91789					42.9984	46.0403	32.563	9.5176	48.3532	37.0572	43.0372	36.5812	46.4689	26.3245	42.0056	44.2634	15.6535	34.1658	41.2682	19.2366	0	40.2062	21.3954	0.686314	39.581	37.265	40.8265
	5	14.6379	40.4343	39.7279	37.1598	29.6214	39.558	35.4312	41.6337	35.3499	40.7946	35.7341	40.3846	9.98752	41.7989	34.3058	33.8608	39.8833	19.1107	39.5444	10.2894	10.8469	27.6524	24.3464	3.60531	0.326797	46.746	46.9375	34.6284	6.41646	49.4369	42.9558	38.301	33.1277	42.305	29.1352	49.3736	45.7197	10.7345	31.6779	42.1707	17.0697		34.1463	24.2525		38.6412	34.6749	42.625
[truncated: 25 more columns]

## Sheet: Panel C
Table 1
	Myeloid cells
1	1.56	3.06	1.73	2.2	1.98	1.89	2.71	1.76	1.61	1.64	0.92	1.98	1.69		1.92	1.8	1.73	2.15	2.2	1.42	1.49	1.77	1.39	0.96	0.54	1.93	2.5	2.07	1.58	2.01	1.93	3.67	2.27	2.39	2.07	2.39	3.93	1.49	2.43	2.13	2.06	1.35	1.89	1.59	1.52	2.79	1.86	1.64	1.83
2	1.22	2.38	1.84	2.42	1.91	2.34	2.34	1.78	1.85	1.86	1.06	2.24	1.04		2.87	1.63	2.55	1.44	2.79	0.85	1.27		1.1	0.46		3.2	3.35	2.14	0.81	3.43	1.66	3.63	2.53	3.54	2.4	3.35	4.36				1.88	0.1	2.34	1.83	0.26	3.07	2.13	2.38	2.44
3								2.26	2.3	2.75	1.46	2.98	1.14		3.08	1.63	3.24	2.13	3.93	0.68	0.86	2.2	1.13	0.28	0.021	4.12	6.14	2.83	0.8	4.97	2.26	5.19	3.84	4.38	1.9	4.23	4.81	0.75	2.83	3.42	1.35	0.015	2.55	1.41	0.065	2.93	2.05	2.39	1.81
4	0.97	4.04	3.22	3.71	2.82	3.22	5.93	2.98	3.03	4.54	1.68	4.64	1.11		3.05	2.06	3.48	1.98	4.18	0.71	0.54					5.22	6.86	3.1	0.73	6.9	2.72	6.83	4.28	6.58	3.18	5.99	6.79	1.03	3.42	3.97	1.26	0	2.34	1.38	0.034	3.59	2.18	2.47	2.77
5	0.95	3.91	2.92	3.14	2.66	3.58	4.56	3.16	2.98	4.21	1.29	4.2	0.8	3.95	3.41	2.14	4.1	2.02	4.86	0.96	0.73	2.45	1.49	0.19	0.018	5.89	7.28	4.1	0.53	8.34	6.22	2.57	3.76	6.13	3.47	6.7	7.21	0.95	4.21	5.09	1.2		1.82	1.46		3.64	2.24	3.41	3.53
[truncated: 24 more columns]

## Sheet: Panel D
Table 1
	Myeloid cells
	1	1	1	1	1	1	1	1	1	1	1	1	1	1	2	2	2	2	2	2	2	2	2	2	2	2	2	2	2	2	3	3	3	3	3	3	3	3	3	3	3	3	3	3	3	3	3	3	3
1	56.1275	56.621	55.1136	55.493	56.2654	55.7103	53.6058	55.4878	56.5217	57.9439	53.1073	58.2873	59.8945		58.7571	59.4901	56.9322	56.6372	56.2201	54.7264	64.0118	51.4535	75.6654	51.7572	57.9861	56.3333	54.4053	56.4171	56.5217	53.6232	59.587	60	58.5624	58.9912	62.2407	60.7143	62.5758	54.9118	57.7731	56.7493	55.4404	58.5242	54.5455	56.0197	54.3478	53.6638	50.1385	55.0595	57.0622
2	61.2426	64.9123	48	54.7315	59.434	60.6715	59.6154	60.2524	55.5891	57.329	57.8571	54.6448	58.4179		51.9038	62.0853	57.5163	58.2168	58.9091	57.8671	76.9373		79.2387	57.5419		58.6694	56	54.5802	57.9618	60.8696	59.4512	57.0259	57.5503	60.1027	65.3501	54.8043	57.9674				51.2295	54.6332	51.2262	53.3962	55.0691	59.0164	52.5836	54.6154	57.1788
3								59.1241	59.9558	58.1776	52.5	56.746	60.4762		56.3403	63.2479	50.7993	55.0447	57.6751	58.4106	78.3654	56.2197	79.902	57.6559	62.1287	57.7508	55.9036	58.3454	55.4307	56.5217	56.7568	53.744	63.2504	57.4324	61.7778	53.9386	58.5562	70	60.9907	53.4162	55.8577	58.8486	54.4554	55.2521	55.8758	55.8442	50.6739	52.1303	63.1902
4	60.9457	59.8746	52.7083	53.4759	56.304	53.1876	58.1673	59.8253	58.7891	60.5753	55.0847	61.2308	57.3634		57.4751	62.8514	53.271	61.0895	59.9085	55.2975	80.8917					61.9942	60.4478	57.3209	66.2824	57.8019	58.0087	56.7478	58.8949	56.5963	54.4944	49.9395	57.3099	75.6757	63.4294	56.9911	58.9792	57.9741	56.8965	54.6351	53.8618	58.7591	58.8556	58.6592	47.8908
5	58.8448	59.7222	49.6614	59.5104	53.1646	52.2852	54.7533	55.7562	57.6147	57.4468	69.3966	61.4516	60.749	58.5455	59.7244	69.6172	56.3107	56.9591	62.0458	59.9761	84.1667	52.7301	84.0173	54.9213	56.6484	60.2086	59.1737	63.6951	61.1902	64.83	55.8111	56.7633	58.8933	53.8278	56.1611	53.8573	58.0607	75.6962	63.6564	56.1605	62.4357		62.6781	55.2632		60.0346	56.6351	63.3987	51.8375
[truncated: 25 more columns]

## Sheet: Panel E-left
Table 1
	Myeloid cells
	1	1	1	1	1	1	1	1	1	1	1	1	1	1	2	2	2	2	2	2	2	2	2	2	2	2	2	2	2	2	3	3	3	3	3	3	3	3	3	3	3	3	3	3	3	3	3	3	3
1	2.29	2.48	1.94	1.97	2.29	2	2.23	1.82	1.95	1.86	0.94	2.11	2.27		2.08	2.1	1.93	2.56	2.35	2.2	2.17	1.77	1.99	1.62	1.67	1.69	2.47	2.11	1.69	1.85	2.02	3.36	2.77	2.69	3	2.72	4.13	2.18	2.75	2.06	2.14	2.3	1.86	2.28	2	2.49	1.81	1.85	2.02
2	2.07	2.59	1.32	2.14	2.52	2.53	2.79	1.91	1.84	1.76	0.81	2	2.88		2.59	2.62	2.64	3.33	3.24	3.31	4.17		2.29	2.06		2.91	3.36	2.86	2.73	3.36	1.95	4.18	3.43	3.51	3.64	3.08	4.62				2.5	2.83	1.88	2.83	2.39	2.88	1.73	2.13	2.27
3								2.43	2.71	2.49	1.05	2.86	3.81		3.51	2.96	2.86	4.31	3.87	4.41	4.89	3.48	3.26	3.05	2.51	3.8	4.64	4.02	2.96	4.29	2.31	4.45	4.32	4.25	4.17	4.04	4.38	3.71	3.94	2.58	2.67	2.76	2.2	2.63	2.52	3.01	1.88	2.08	2.06
4	3.48	3.82	2.53	3	3.26	2.92	5.84	2.74	3.01	3.58	1.3	3.98	4.83		3.46	3.13	2.85	4.71	3.93	3.81	5.08					4.29	4.86	3.68	4.6	4.26	2.68	5.13	4.37	4.29	4.85	4.13	4.9	4.2	4.18	3.22	3.12	2.69	1.98	2.77	2.65	3.22	2.16	2.1	1.93
5	3.26	3.44	2.2	3.16	3.36	2.86	4.55	2.47	3.14	3.51	1.61	3.81	4.38	3.22	3.9	2.91	3.48	4.87	4.61	5.02	5.05	3.38	3.89	2.79	3.11	4.04	4.87	4.93	4.73	5.53	4.61	2.35	4.47	4.5	4.74	3.7	4.97	5.98	5.78	3.92	3.64		2.2	2.52		3.47	2.39	2.91	2.68
[truncated: 25 more columns]

## Sheet: Panel E-right
Table 1
	Myeloid cells
1	1.79	1.9	1.58	1.58	1.78	1.59	1.93	1.46	1.5	1.35	0.83	1.51	1.52		1.46	1.43	1.46	1.96	1.83	1.82	1.22	1.67	0.64	1.51	1.21	1.31	2.07	1.63	1.3	1.6	1.37	2.24	1.96	1.87	1.82	1.76	2.47	1.79	2.01	1.57	1.72	1.63	1.55	1.79	1.68	2.15	1.8	1.51	1.52
2	1.31	1.4	1.43	1.77	1.72	1.64	1.89	1.26	1.47	1.31	0.59	1.66	2.05		2.4	1.6	1.95	2.39	2.26	2.41	1.25		0.6	1.52		2.05	2.64	2.38	1.98	2.16	1.33	3.15	2.53	2.33	1.93	2.54	3.35				2.38	2.35	1.79	2.47	1.95	2	1.56	1.77	1.7
3								1.68	1.81	1.79	0.95	2.18	2.49		2.72	1.72	2.77	3.52	2.84	3.14	1.35	2.71	0.82	2.24	1.53	2.78	3.66	2.87	2.38	3.3	1.76	3.83	2.51	3.15	2.58	3.45	3.1	1.59	2.52	2.25	2.11	1.93	1.84	2.13	1.99	2.38	1.83	1.91	1.2
4	2.23	2.56	2.27	2.61	2.53	2.57	4.2	1.84	2.11	2.33	1.06	2.52	3.59		2.56	1.85	2.5	3	2.63	3.08	1.2					2.63	3.18	2.74	2.34	3.11	1.94	3.91	3.05	3.29	4.05	4.14	3.65	1.35	2.41	2.43	2.17	1.95	1.5	2.3	2.27	2.26	1.51	1.48	2.1
5	2.28	2.32	2.23	2.15	2.96	2.61	3.76	1.96	2.31	2.6	0.71	2.39	2.83	2.28	2.63	1.27	2.7	3.68	2.82	3.35	0.95	3.03	0.74	2.29	2.38	2.67	3.36	2.81	3	3	3.65	1.79	3.12	3.86	3.7	3.17	3.59	1.92	3.3	3.06	2.19		1.31	2.04		2.31	1.83	1.68	2.49
[truncated: 24 more columns]

## Sheet: Panel F
Table 1
	Myeloid cells
	3	3	3	3	3	3	3	4	4	4	4	4	4	4	5	5	5	5	5	5	5	5	5	5	5	6	6	6	6	13	13	13	13	13	13
1	0.22486	0.365535	0.298429	0.298673	0.334994	0.286067	0.321188	0.335788	0.298156	0.306413	0.373308	0.321978	0.374619		0.255952	0.237462	0.334471									0.33082	0.379171	0.332502	0.31575	0.34384		0.324974	0.277541	0.326377
2	0.390897	0.418848	0.290581	0.364333	0.376357	0.359729	0.276169	0.409774	0.414808	0.318266	0.38064	0.444562	0.366507	0.414824	0.367563	0.378493	0.347862	0.277027	0.372061	0.366593	0.338144	0.333333	0.357688	0.283595	0.304199
3	0.36	0.358974	0.310204	0.412565	0.389163	0.384693	0.371837	0.392317			0.437257		0.337456		0.351796	0.413686	0.362946	0.347409	0.400938	0.384169	0.351073	0.379103		0.323672	0.345858	0.390435	0.366135	0.344239	0.403952	0.424522	0.357805	0.323664	0.385106	0.409664
4	0.383754	0.372203	0.346574	0.383215	0.348974	0.457979	0.296045	0.442308	0.421263	0.436179	0.368988	0.477861	0.352892		0.381337	0.434125	0.37633	0.36	0.418987	0.389716	0.446792	0.409731	0.329462	0.33771	0.360206	0.389592	0.362232	0.399067	0.43789	0.465148	0.444367	0.372747	0.351447	0.51802	0.373436
5	0.341007	0.289421	0.310854	0.353721	0.323501	0.437115	0.381919	0.446305	0.398014	0.421005	0.430813	0.498494	0.383528		0.357194	0.381059	0.390509	0.420279	0.451296	0.434447	0.451893	0.424042	0.301331	0.305372	0.316083	0.36469	0.378594	0.376978	0.392745	0.483643	0.38774			0.414828	0.403347
6	0.390326	0.367914	0.344828	0.303403	0.359332	0.480089	0.34981	0.454458	0.438322	0.436396	0.415338	0.740578	0.386346		0.373209	0.352164	0.396226	0.420671	0.413091	0.466232		0.409689	0.35461	0.300938	0.284833	0.394792	0.421137	0.460123	0.454684	0.532211	0.392916	0.326325	0.374912	0.452081
7	0.372263	0.347342	0.311321		0.369058	0.429341	0.353457	0.435203	0.431937	0.412892	0.404306	0.498516	0.444165		0.421474	0.354659	0.412371	0.421249	0.461114	0.470223	0.50682	0.41502	0.342964	0.320731	0.255556	0.435146	0.421902	0.410557	0.421811	0.479308	0.37971	0.358713	0.416189
8	0.481957	0.459124	0.386503			0.319853	0.334619	0.45864	0.46124	0.400855	0.449924	0.507703	0.384883	0.404619	0.450199	0.318146	0.395791	0.433924	0.417559	0.457512	0.474486	0.374322	0.394737	0.304613	0.263644	0.425756	0.426752	0.389091	0.444604	0.536272	0.400287	0.333061
9		0.287891	0.466232		0.526761	0.518293	0.31493	0.445122	0.44586	0.38835	0.483618	0.4978	0.401121		0.486547	0.339367	0.454779	0.409794	0.410714	0.462253	0.457476	0.368715	0.494821		0.248442	0.41526	0.421263	0.408197	0.466297	0.536709	0.446714	0.349484	0.425969

## Sheet: Panel G
Table 1
All data points
HSPC	0.2	0.22	0.25	0.24	0.27	0.21	0.15	0.2	0.18	0.21	0.2	0.24	0.22	0.22	0.3	0.33	0.39	0.35			0.23	0.15	0.21	0.21	0.18	0.58	0.24	0.23	0.21		0.18	0.22	0.23	0.31	0.24	0.18	0.18	0.19	0.19
MPP4	0.1	0.1	0.12	0.12	0.1	0.076	0.08	0.076	0.075	0.097	0.1	0.12	0.11	0.12	0.12	0.15	0.17	0.15			0.11	0.046	0.093	0.11	0.089	0.28	0.14	0.13	0.11		0.097	0.12	0.099	0.17	0.094	0.09	0.1	0.1	0.1
LT-HSC	0.032	0.028	0.029	0.032	0.034	0.031	0.019	0.025	0.03	0.021	0.026	0.033	0.031	0.021	0.045	0.033	0.047	0.046			0.032	0.032	0.031	0.029	0.02	0.041	0.015	0.024	0.017		0.015	0.013	0.028	0.022	0.02	0.015	0.015	0.016	0.015
ST-HSC	0.01	0.029	0.038	0.022	0.028	0.033	0.018	0.025	0.024	0.024	0.017	0.022	0.023	0.016	0.027	0.026	0.027	0.029			0.013	0.013	0.013	0.00705	0.013	0.055	0.018	0.018	0.023		0.019	0.021	0.032	0.031	0.039	0.024	0.017	0.018	0.025
MPP2	0.00706	0.00493	0.00427	0.00616	0.02	0.00759	0.00283	0.012	0.00608	0.011	0.00302	0.00612	0.00439	0.00573	0.014	0.015	0.02	0.02			0.011	0.00692	0.012	0.012	0.00685	0.039	0.00336	0.00524	0.00387		0.00138	0.00182	0.00682	0.00494	0.00591	0.00152	0.00231	0.00241	0.00127
MPP3	0.013	0.03	0.024	0.02	0.068	0.038	0.02	0.05	0.025	0.04	0.014	0.016	0.016	0.016	0.027	0.048	0.046	0.039			0.013	0.00948	0.016	0.011	0.024	0.11	0.028	0.022	0.028		0.011	0.015	0.037	0.049	0.049	0.00796	0.01	0.014	0.018
Average of biological replicates
HSPC	0.213	0.28125	0.248889	0.213333
MPP4	0.0944	0.13	0.123111	0.107778
LTHSC	0.0281	0.03525	0.0267778	0.0176667
STHSC	0.0251	0.023375	0.0192278	0.0251111
MPP2	0.008192	0.0110325	0.0111378	0.00315333
MPP3	0.0328	0.02775	0.0290533	0.02344
