# Supplementary material for: Dynamic tracking of native precursors in adult mice
Source: eLife. 2024 Dec 5;13:RP97504. doi: 10.7554/eLife.97504 (PMC11620740; doi:10.7554/eLife.97504)
Supplement: Figure 3—source data 1. [file elife-97504-fig3-data1.xlsx]

## Sheet: Figure 3B left
Table 1
Average of biological replicates	B cells
	1	2	3	4
1	0.853077	0.8125	0.871429	0.700545
2	1.25	1.49079	1.29176	1.2506
3	1.64333	1.9545	1.86952	1.84129
4	2.18538	2.96567	2.38667	2.16867
5	2.66929	3.411	2.83316	2.57
6	2.82273	4.32375	3.23941	3.16615
7	3.271	4.41125	4.28111	3.51625
All data points		B cells
		1	1	1	1	1	1	1	1	1	1	1	1	1	1	2	2	2	2	2	2	2	2	2	2	2	2	2	2	2	2	3	3	3	3	3	3	3	3	3	3	3	3	3	3	3	3	3	3
1	1	0.78	1.24	0.8	0.86	1.15	0.67	1.27	0.69	0.72	0.66	0.55	0.83	0.87		0.77	0.54	0.72	0.94	1.05	0.79	0.65	0.74	0.61	0.72	0.65	0.99	0.94	5.98	0.86	1.15	0.92	1.8	1.31	1.28	1.34	1.09	1.1	0.79	0.99	0.76	0.64	0.79	0.73	0.78	0.75	0.72	0.39	0.62
2	2	1.09	1.4	0.92	1.43	1.32	1.44	1.77	1.1	1.01	1.33	0.51	1.44	1.49		1.64	0.83	1.29	1.83	1.45	1.75	1.53		0.941	1.13		1.51	1.85	1.48	1.52	2.12	1.16	2.57	2.05	2.08	1.98	1.95	2.16				0.86	0.97	0.72	0.95	0.79	1.04	0.53	0.75
3	3								1.41	1.41	1.68	0.7	1.97	2.69		2.21	1.04	1.68	3.01	1.41	2.37	1.788	1.82	1.064	1.29	1.41	1.97	2.84	2.3	2.01	3.06	1.54	3.23	3.09	2.96	2.5	2.87	2.98	1.84	2.43	2.08	1.51	1.53	1.27	1.48	1.36	1.53	0.85	1.34
4	4	2.03	2.5	1.57	2.24	1.94	2.33	3.24	1.87	1.96	2.52	1.08	2.74	2.39		2.51	1.51	2.27	3.51	1.94	3.18	2.608					2.91	3.87	3.51	2.96	4.81	1.69	3.96	3.75	3.83	3.98	3.64	3.38	2.27	3.13	2.61	1.83	2.11	1.76	1.89	1.82	2.02	0.94	1.58
5	5	2.25	2.89	1.86	2.55	2.8	2.75	4.03	1.8	2.52	3.22	1.31	3.87	2.83	2.69	3.61	1.99	2.71	4.13	2.98	3.93	3.21	3.14	2.276	2.26	2.44	3.67	4.81	4.5	3.43	5.49	4.65	1.79	4.1	4.44	4.17	3.7	3.99	2.8	4.02	3.13	2.15		1.91	2.24		2.34	1.35	2.01
6	6	2.22	2.8	2.14	2.7				2.2	2.91	4.06	1.14	4.13	3.56	3.19	3.95	2.61	3.34		4.1							4.22	5.76	4.5		6.11	1.96		4.82	5.24	5.78	4.67	4.91	2.6	4.55	3.38	2.57		1.9	2.5		2.58	1.56	2.06
7	7		2.95	2.31	3.1			4.46	2.39	3.34	3.95	1.59	5.16		3.46	4.84	2.56	3.83		3.68							4.17	5.46	4.63		6.12			5.29	5.85		5.38	6.97		4.84	3.35	2.71		1.91					2.23
[truncated: 100 more columns]

## Sheet: Figure 3B Right
Table 1
Average of biological replicates		Myeloid cells				BM
		1	2	3	4	1	2	3	4
1	1	3.57462	3.52312	4.14095	4.21818
2	2	3.58923	4.93286	5.05059	5.0405
3	3	4.375	6.19813	5.37143	4.96476
4	4	5.90077	6.62333	5.7681	5.02667
5	5	5.59714	6.73688	6.34684	5.18067
6	6	5.37636	8.6725	6.16118	5.51846
7	7	6.253	7.72875	7.24667	5.705
HSPC	8					4.521	7.1875	6.56875	4.76556
All data points		Myeloid cells
		1	1	1	1	1	1	1	1	1	1	1	1	1	1	2	2	2	2	2	2	2	2	2	2	2	2	2	2	2	2	3	3	3	3	3	3	3	3	3	3	3	3	3	3	3	3	3	3
1	1	4.08	4.38	3.52	3.55	4.07	3.59	4.16	3.28	3.45	3.21	1.77	3.62	3.79		3.54	3.53	3.39	4.52	4.18	4.02	3.39	3.44	2.63	3.13	2.88	3	4.54	3.74	2.99	3.45	3.39	5.6	4.73	4.56	4.82	4.48	6.6	3.97	4.76	3.63	3.86	3.93	3.41	4.07	3.68	4.64	3.61	3.36
2	2	3.38	3.99	2.75	3.91	4.24	4.17	4.68	3.17	3.31	3.07	1.4	3.66	4.93		4.99	4.22	4.59	5.72	5.5	5.72	5.42		2.89	3.58		4.96	6	5.24	4.71	5.52	3.28	7.33	5.96	5.84	5.57	5.62	7.97				4.88	5.18	3.67	5.3	4.34	4.88	3.29	3.9
3	3								4.11	4.52	4.28	2	5.04	6.3		6.23	4.68	5.63	7.83	6.71	7.55	6.24	6.19	4.08	5.29	4.04	6.58	8.3	6.89	5.34	7.59	4.07	8.28	6.83	7.4	6.75	7.49	7.48	5.3	6.46	4.83	4.78	4.69	4.04	4.76	4.51	5.39	3.71	3.99
4	4	5.71	6.38	4.8	5.61	5.79	5.49	10.04	4.58	5.12	5.91	2.36	6.5	8.42		6.02	4.98	5.35	7.71	6.56	6.89	6.28					6.92	8.04	6.42	6.94	7.37	4.62	9.04	7.42	7.58	8.9	8.27	8.55	5.55	6.59	5.65	5.29	4.64	3.48	5.07	4.92	5.48	3.67	3.58
5	5	5.54	5.76	4.43	5.31	6.32	5.47	8.31	4.43	5.45	6.11	2.32	6.2	7.21	5.5	6.53	4.18	6.18	8.55	7.43	8.37	6	6.41	4.63	5.08	5.49	6.71	8.23	7.74	7.73	8.53	8.26	4.14	7.59	8.36	8.44	6.87	8.56	7.9	9.08	6.98	5.83		3.51	4.56		5.78	4.22	4.59
6	6	5.38	5.04	4.35	5.05				4.01	5.36	7.02	2.86	6.66	8.05	5.36	8.79	5.87	7.56		9.5							7.68	10.43	10.28		9.27	4.03		7.91	8.5	8.69	7.6	8.66	6.49	8.06	7.71	5.33		4.54	5.01		5.81	4.22	3.63
7	7		6.37	4.29	6.08			8.06	5.22	6.56	7.6	3.16	9.69		5.5	7.34	5.11	6.89		8.07							7.58	9.14	8.64		9.06			8.18	9		7.75	8.74		8.35	7.7	5.47		5.06					4.97
HSPC	8
[truncated: 100 more columns]

## Sheet: Figure 3C
Table 1
Average of biological replicates		Myeloid cells				BM
		1	2	3	4	1	2	3	4
1	1	56.1676	57.5586	57.0425	55.7519
2	2	57.8998	60.5927	56.2182	55.8197
3	3	57.8299	59.9839	57.2492	58.2549
4	4	57.5025	61.2193	57.7291	56.0484
5	5	57.7787	62.8884	59.2421	57.437
6	6	60.4008	62.0774	57.6642	58.5578
7	7	59.6818	58.5886	57.9333	58.6377
HSPC	8					56.2364	62.9443	60.7433	59.8602
All data points		Myeloid cells
1	1	56.1275	56.621	55.1136	55.493	56.2654	55.7103	53.6058	55.4878	56.5217	57.9439	53.1073	58.2873	59.8945		58.7571	59.4901	56.9322	56.6372	56.2201	54.7264	64.0118	51.4535	75.6654	51.7572	57.9861	56.3333	54.4053	56.4171	56.5217	53.6232	59.587	60	58.5624	58.9912	62.2407	60.7143	62.5758	54.9118	57.7731	56.7493	55.4404	58.5242	54.5455	56.0197	54.3478	53.6638	50.1385	55.0595
2	2	61.2426	64.9123	48	54.7315	59.434	60.6715	59.6154	60.2524	55.5891	57.329	57.8571	54.6448	58.4179		51.9038	62.0853	57.5163	58.2168	58.9091	57.8671	76.9373		79.2387	57.5419		58.6694	56	54.5802	57.9618	60.8696	59.4512	57.0259	57.5503	60.1027	65.3501	54.8043	57.9674				51.2295	54.6332	51.2262	53.3962	55.0691	59.0164	52.5836	54.6154
3	3								59.1241	59.9558	58.1776	52.5	56.746	60.4762		56.3403	63.2479	50.7993	55.0447	57.6751	58.4106	78.3654	56.2197	79.902	57.6559	62.1287	57.7508	55.9036	58.3454	55.4307	56.5217	56.7568	53.744	63.2504	57.4324	61.7778	53.9386	58.5562	70	60.9907	53.4162	55.8577	58.8486	54.4554	55.2521	55.8758	55.8442	50.6739	52.1303
4	4	60.9457	59.8746	52.7083	53.4759	56.304	53.1876	58.1673	59.8253	58.7891	60.5753	55.0847	61.2308	57.3634		57.4751	62.8514	53.271	61.0895	59.9085	55.2975	80.8917					61.9942	60.4478	57.3209	66.2824	57.8019	58.0087	56.7478	58.8949	56.5963	54.4944	49.9395	57.3099	75.6757	63.4294	56.9911	58.9792	57.9741	56.8965	54.6351	53.8618	58.7591	58.8556	58.6592
5	5	58.8448	59.7222	49.6614	59.5104	53.1646	52.2852	54.7533	55.7562	57.6147	57.4468	69.3966	61.4516	60.749	58.5455	59.7244	69.6172	56.3107	56.9591	62.0458	59.9761	84.1667	52.7301	84.0173	54.9213	56.6484	60.2086	59.1737	63.6951	61.1902	64.83	55.8111	56.7633	58.8933	53.8278	56.1611	53.8573	58.0607	75.6962	63.6564	56.1605	62.4357		62.6781	55.2632		60.0346	56.6351	63.3987
6	6	61.8959	60.5159	51.954	61.3861				57.1072	58.5821	58.1197	69.2308	65.9159	60	59.7015	56.5415	67.8024	55.6878		67.8947							62.3698	60.3068	59.2413		66.7745	54.5906		55.1201	60.3529	56.0414	54.6053	55.0808	71.9569	59.9256	54.4747	55.3471		56.1674	55.8882		56.7986	56.872	61.9835
7	7		58.5557	55.9441	56.7434			52.3573	59.9617	56.7073	60	67.4051	69.1435		60	53.406	60.8611	51.8142		63.6927							58.971	59.1904	57.6389		63.1347			60.8802	55.1111		55.4839	51.8307		58.6826	58.0519	58.6837		58.8933					63.7827
HSPC	8
[truncated: 97 more columns]

## Sheet: Figure 3D
Table 1
	Myeloid cells
1		3.82156	3.88062	3.84379
2	3.54338	3.83077	3.76165	4.05709
3	3.81269		3.56239	3.81127
4	3.64244	3.42816	3.67647	3.63413
5	3.51389	3.25826	3.41681	3.38728
6	3.79141	3.04473	3.9018	3.63378
7	3.25351	3.2414	3.44679	3.22558

## Sheet: Figure 3E
Table 1
	BM
MP	3.26422	3.04214	3.2119	3.47636
HSPC	3.51242	3.04306	3.22818	3.34688
LT-HSC	2.76659	2.5408	2.61314	2.51598
ST-HSC	2.41986	2.31333	2.60231	2.46193
MPP2	2.94753	2.93381		2.97145
MPP3	3.00932	2.64911	2.74024	3.09028
MPP4	3.27344	2.99011	3.20539	3.12639

## Sheet: Figure 3F
Table 1
	BM
HSPC	-4.18404	-3.59397	-3.83218	-4.01782
LT-HSC	-4.31789	-3.99364	-4.18536	-4.26882
ST-HSC	-4.02019	-3.94458	-4.31838	-4.06207
MPP2	-5.03414	-4.89113		-5.47268
MPP3	-4.49344	-4.20584	-4.27705	-4.72033
MPP4	-4.29847	-3.87617	-4.1151	-4.09386
