# Supplementary material for: Dynamic tracking of native precursors in adult mice
Source: eLife. 2024 Dec 5;13:RP97504. doi: 10.7554/eLife.97504 (PMC11620740; doi:10.7554/eLife.97504)
Supplement: Figure 4—figure supplement 1—source data 1. [file elife-97504-fig4-figsupp1-data1.xlsx]

## Sheet: Panel A
Table 1
All data points	before	after	Average of biological replicates	before	after
	29.6413	13.2139		32.1879	16.2827
	36.0731	25.8324		31.4511	18.3001
	30.9474	12.4439		27.1303	19.4015
	30.8421	14.5107		32.9557	12.745
	31.8612	16.0053		32.0194	23.5584
	29.8947	16.6667
	36.0551	15.3061
	31.7378	9.25508
	28.9749	13.2561
	30.721	24.0678
	30.0105	16.7364
	35.8115	28.1853
	29.8083	26.0135
	27.6371	14.1097
	26.4957	20.0684
	25.5839	21.646
	24.5503	18.1818
	28.7066	16.3898
	29.6218	10.6883
	41.7124	8.809
	31.1647	12.2
	34.5872	17.3021
	25.8299	11.7196
	35.1097	15.0652
	32.6638	13.431
	37.5	19.7
	26.1	10.9
	32.7	16
	19.7	22.9
	34.1	19.7
	41.7	22
	23.4	12.5

## Sheet: Panel B
Table 1
All data points	5-FU																																				UT
	10	10	10	10	10	10	10	11	11	11	11	11	11	11	11	12	12	12	12	12	12	13	13	13	13	13	13	13	14	14	14	14	14	14	14		1	1	1
CMP	4.19	1.2	3.6	3.17	2.27	2.44	1.74	2.68	2.31	1.43	0.91	5.89	5.69	3.67	0.79	4.19	4.51	6.1	6.07	1.66	2.39	4.97	4.3	3.12	1.04	1.4	2.67	1.73	1.29	5.73	1.14	1.07	0.58	0.78	3.88		0.38	0.45	0.54	0.32	0.44	0.46	0.32	0.43	0.33	0.32	0.37	0.46	0.35
GMP	5.24	1.6	4.4	4.07	3.46	2.16	1.74	3.96	3.78	2.36	2.37	3.94	4.88	3.39	1.38	4.95	4.65	5.24	5.51	2.4	2.86	4.24	3.85	3.51	2.56	1.5	2.58	2.22	2.69	4.37	1.39	1.81	1.35	0.61	4.21		0.5	0.37	0.49	0.96	0.59	0.45	0.27	0.39	0.27	0.37	0.14	0.18	0.13
MEP	3.32	1.63	1.99	2.77	2.91	3.29	2.13	3.91	2.93	2.53	3.06	2.86	3.73	2.06	0.9	1.36	0.95	1.88	1.49	1.87	1.39	2.04	1.57	1.92	2.12	2.44	1.23	1.98	1.2	1.58	1.33	3.81	1.19	0.69	2.14		0.38	0.27	0.43	0.55	0.63	0.72	0.3	0.29	0.27	0.3	0.35	0.44	0.3
HSPC	17.3	1.71	16.5	11.1	9.98	5.26	7.55	11.5	14.1	2.88	4.6	9.68	12	5.71	0.86	7.17	9.88	8.12	10.2	3.06	4.77	9.37	9.29	7.91	2.36	2.19	6.71	4.85	5.11	12.1	1.63	2.52	0.82	0.69	7.51		0.2	0.22	0.25	0.24	0.27	0.21	0.15	0.2	0.18	0.21	0.2	0.24	0.22
LT-HSC	3.67	0.31	3.91	1.98	1.65	0.92	1.79	1.91	2.99	0.49	0.56	1.97	2.19	1.35	0.13	1.56	2.34	1.35	2.32	0.49	1.1	2.5	1.73	1.81	0.33	0.54	1.72	1.08	0.85	2.58	0.39	0.45	0.14	0.15	1.35		0.032	0.028	0.029	0.032	0.034	0.031	0.019	0.025	0.03	0.021	0.026	0.033	0.031
ST-HSC	1.58	0.16	1.23	0.62	0.25	0.4	0.6	0.63	0.47	0.17	0.21	0.34	0.33	0.16	0.03	0.3	0.34	0.27	0.46	0.1	0.1	0.2	0.11	0.083	0.032	0.058	0.086	0.043	0.033	0.19	0.065	0.013	0.024	0.073	0.11		0.01	0.029	0.038	0.022	0.028	0.033	0.018	0.025	0.024	0.024	0.017	0.022	0.023
MPP2	1.64	0.11	2.03	1.3	1.97	0.52	0.84	1.42	1.86	0.17	0.55	1.38	1.81	0.73	0.078	0.8	1.42	1.23	1.59	0.47	1.06	1.88	1.71	2.01	0.46	0.46	1.73	1.22	1.28	2.57	0.22	0.64	0.098	0.045	1.08		0.00706	0.00493	0.00427	0.00616	0.02	0.00759	0.00283	0.012	0.00608	0.011	0.00302	0.00612	0.00439
MPP3	7.65	0.6	6.95	4.09	4.61	1.98	3.13	4.79	5.43	1.24	1.81	1.99	2.05	0.92	0.17	1.37	1.97	1.76	2.33	0.65	1.57	2.01	1.52	1.77	0.5	0.59	1.42	0.96	1.05	2.09	0.36	0.41	0.22	0.12	1.3		0.013	0.03	0.024	0.02	0.068	0.038	0.02	0.05	0.025	0.04	0.014	0.016	0.016
MPP4	2.12	0.42	1.73	2.71	0.97	1.25	0.95	2.31	2.64	0.64	1.26	3.35	4.94	2.11	0.43	2.64	3.06	2.85	2.89	1.15	0.82	2.1	3.12	1.68	0.8	0.43	1.25	1.15	1.42	3.46	0.44	0.75	0.25	0.13	2.72		0.1	0.1	0.12	0.12	0.1	0.076	0.08	0.076	0.075	0.097	0.1	0.12	0.11
Average of biological replicates	5-FU					UT
CMP	2.65857	2.92125	4.15333	2.74714	2.06714	0.399	0.41125	0.26375	0.38
GMP	3.23857	3.2575	4.26833	2.92286	2.34714	0.466	0.35375	0.255	0.333333
MEP	2.57714	2.7475	1.49	1.9	1.70571	0.414	0.3775	0.3375	0.25
HSPC	9.91429	7.66625	7.2	6.09714	4.34	0.213	0.28125	0.248889	0.213333
LT-HSC	2.03286	1.44875	1.52667	1.38714	0.844286	0.0281	0.03525	0.0267778	0.0176667
ST-HSC	0.691429	0.2925	0.261667	0.0874286	0.0725714	0.0251	0.023375	0.0192278	0.0251111
MPP2	1.20143	0.99975	1.095	1.35286	0.847571	0.008192	0.0110325	0.0111378	0.00315333
MPP3	4.14429	2.3	1.60833	1.25286	0.792857	0.0328	0.02775	0.0290533	0.02344
MPP4	1.45	2.21	2.235	1.50429	1.31	0.0944	0.13	0.123111	0.107778
[truncated: 23 more columns]

## Sheet: Panel C
Table 1
All data points		B cells																									T cells
1	1								6.55	6.59			6.02		5.03			7.16	7.32		4.57	6.25	4.77			3.57								6.27	5.56			7.45		3.76			6.15	7.49		3.39	4.28	4.12
2	2	6.91	6.69	7.49	9.23	8.35	7.7	6.64	7.57	7.44	3.73	7.26	8.02	9.31	4.24	8.95	10.26	6.05	7.02								6.63	6.12	6.01	13.88	6.47	6.82	3.51	6.18	6.43	2.99	4.72	7.42	6.18	3.35	6.35	8.61	5.79	6.47
3	3	6.17	7.29	6.38	8.84	6.39	6.68	6.39			3.14	6.49	8.66	9.22	4.72	9.26	10.66	6.3	7.44	4.33	3.73	4.51	4.08	2.8	3.98	3.87	6	6.01	5.77	12.97	6.66	6.39	4.88			2.46	6.14	8.68	8.23	4.09	8.11	9.53	5.87	6.71	3.69	3.45	4.84	4.75	2.77
4	4	6.58	8.11	6.8	8.52	6.56	7.05	6.07	6.79	6.42	2.93	6.44	9.1	8.6	5.05	9.51	10.97	6.79	7.69	3.77	3.83	4.47	4.03	2.34	2.96		6.51	6.93	7.56	10.6	6.56	7.48	5.62	6.81	6.55	2.54	6.09	8.86	8.36	4.44	9.16	10.46	6.49	6.8	3.95	3.72	4.77	4.65	2.34
5	5	7.19	7.76	6.91	8.61	6.48	6.44	5.93	6.66	5.89	3.22	5.99	8.45	7.66	4.75	9.65	10.77	7.1		4.11	3.98	4.06	3.41		2.97		6.95	7.52	8.71	10.07	7.31	7.56	5.24	6.12	6.14	2.64	6.39	8.85	8.64	4.85	8.99	10.41	6.39		4.17	3.64	4.57	3.94
6	6	8.15	8.42	6.34	8.55		6.68	5.64	8.68	5.4	2.92	6.39	9.02	8.95	4.61	9.44	10.51	6.65	7.56	3.77	4.55	3.5	3.4	2.83	2.89		7.7	7.64	7.44	9.61		7.02	4.85	9.27	5.78	2.77	7.42	9.28	8.91	5.05	9.74	10.23	7.45	7.52	3.7	4.52	3.99	4.32	2.45
7	7	8.7	7.8	6.45	8.79	6.68	7.03	5.02	8.28	6.49	3.48	6.69	9.51	8.2	4.77	9.26	10.3		8.15	3.5	4.17	3.57	3.19	2.81	2.69		8.75	7.21	8.08	9.46	6.64	6.28	5	6.9	5.78	2.8	7.11	8.85	8.29	4.85	9.51	10.18		7.05	3.57	4.33	4.19	3.7	2.51
8	8	9.76	8.43	7.75	8.87	7.15	7.37	4.99	7.81	6.03		6.87	9.25		4.58	8.66	10.25		8.81		3.89			3.39	3.62		9.63	8.17	8.16	7.85	6.52	7.97	5.16	6.1	5.62		6.12	9.09		4.75	8.09	8.69		6.58		4.11			3.29
9	9	10.47	8.71	7.3	8.62	7.88	8.78	4.98																			9.02	8.51	8.41	9.02	7.52	7.65	4.82
Average of biological replicates		B cells			T cells			Myeloid cells
1	1		6.445	4.79		6.11333	3.9925		6.82	4.6425
2	2	7.57286	7.25909		7.27429	5.86273		7.76143	7.30091
3	3	6.87714	7.32111	3.9	6.95429	6.64667	3.82286	8.85429	7.58333	4.01857
4	4	7.09857	7.29909	3.56667	7.32286	6.96	3.735	7.52143	7.32	4.39833
5	5	7.04571	7.014	3.706	7.62286	6.942	3.846	7.33857	7.426	4.53
6	6	7.29667	7.28455	3.49	7.37667	7.58364	3.59333	7.67	7.48909	4.71667
7	7	7.21	7.513	3.32167	7.34571	7.132	3.515	8.29	7.349	4.18667
8	8	7.76	7.7825	3.63333	7.63714	6.88	3.43333	8.86143	7.96	4.93
9	9	8.10571			7.85			8.69143
[truncated: 25 more columns]

## Sheet: Panel D
Table 1
E14.5		RFP%																																			YFP%
1	1	43.2566	43.7309	42.9787	41.9185	44.1176	46.7877	42.0753	35.1399	36.973	41.8064	34.7788	42.3402	36.8899		43.4884	43.282	44.8396									39.486	33.1347	41.1347	45.3671	34.4096		35.8156	36.5436	44.6942		26.9737	30.8868	26.2411	26.8068	19.5588	25.2793	23.4892	27.7972	30.1622	25.4194	26.9731	21.7129	27.8093
2	2	37.1812	43.5526	43.8007	42.4346	35.9944	44.0936	41.7431	38.3753	40.1087	37.7934	35.6164	47.8261	43.1138	44.0049	35.3949	47.7941	41.1605	44.5032	46.8696	42.5958	41.8803	40.0351	41.1602	46.6848	39.5161											40.2685	25	32.6767	29.4653	33.0532	30.4094	32.3394	30.8123	27.7174	30.9859	28.865	24.0338	25.7485
3	3	40.1734	47.3251	46.4	37.9233	38.7013	41.25	49.1961	35.7627			39.8804		43.0108		39.569	46.5403	42.6405	40.6375	50	44.8793	46.0626	38.7564		44.3668	39.9475	41.0329	38.6318	44.2097	45.7926	37.1534	42.5735	36.0566	47.7953	36.3428		37.7168	23.4568	30.3	33.8601	33.7662	28.8636	28.7245	27.1186			25.0214		28.4458
4	4	37.6791	43.718	47.7754	32.7059	42.7012	42.2301	44.3126	43.379	34.0793	35.4209	41.3441	44.8956	36.6606		40.7514	45.8481	44.3973	40.6977	51.0067	44.2582	47.6757	37.8378	44.0308	43.3566	39.917	38.3057	40.9756	41.4469	45.3309	43.5673	42.4513	36.9075	46.2867	35.6902	35.918	37.9656	25	31.3559	36.2353	32.8786	31.3167	26.3106	24.0487	34.8932	31.2115	20.0146	20.8817	32.5771
5	5	35.8079	44.0098	46	34.4828	42.8254	42.0242	44.0489	42.0981	34.8223	36.3546	41.0675	45.9399	34.2702		41.7563	42.1373	47.6649	38.8298	46.2411	43.8941	49.4118	36.0244	48.1622	43.5897	42.5998	38.4804	43.6036	40.0596	40.7858	44.0635	44.8949			37.1004	34.7443	41.4847	25.3056	32.8889	36.2625	31.3682	29.593	25.3615	20.8447	34.1117	27.9881	20.2372	20.9121	34.5422
6	6	35.9396	45.3646	50.8306	35.2174	46.3259	36.551	48.1323	41.0915	28.2458	35.3229	40.6296	45.9034	36.0431		43.0689	38.332	41.8344	35.0829	43.1682	38.5725		36.139	52.5926	37.788	47.0447	34.8659	43.1798	39.0262	39.6631	41.2888	42.217	34.7059	44.7028	37.8358		38.8203	27.4413	32.0044	33.1522	28.8605	33.731	23.3725	23.435	38.0575	30.6262	18.9605	19.6429	34.8678
7	7	32.46	42.8571	50.4049		42.3625	34.4828	47.7246	38.4717	26.4368	32.9412	38.6873	40.0917	34.3023		42.6704	37.2488	35.6436	35.954	42.3266	36.4376	44.515	34.4611	53.4678	38.3869	48.2558	33.0947	40.7045	34.2687	37.6698	46.9388	41.6406	39.1366	42.623			45.5604	28.3372	31.1741		31.4664	29.7414	26.6044	26.087	39.3939	32.2549	19.4595	19.4495	35.0775
8	8	37.4877	28.5714	42.5843			40.8984	49.1036	31.7522	28.5263	33.1439	37.8299	40.4719	38.5178	27.5796	40.0177	42.9681	35.0421	32.1632	39.7842	37.0703	45.7979	33.8855	51.5289	38.1762	48.2129	32.8682	39.203	32.9975	34.816	43.4746	39.8764	35.3659				26.6928	27.2201	27.9775			29.9054	32.2709	22.362	40.8421	28.7879	19.1349	21.5064	31.9305
9	9		37.9504	44.5045		37.1191	23.5585	41.2008	35.4554	27.3799	30.6011	37.6344	36.4286	40.3571		36.8152	36.4118	33.5004	31.2829	38.8308	32.551	41.6946	36.8911	41.3487		48.0904	33.1091	41.9388	30.8896	33.9869	35.6155	38.638	35.745	34.1868				33.5586	29.5495		26.0388	29.1598	30.8489	25.857	38.8939	33.9709	19.8925	19.4444	28.3929
E11.5		RFPConf%																									YFPConf%
1	1								35.2672	37.1775			37.7076		37.7734			42.0391	40.5738		36.9803	52.8	32.7044			36.4146								37.4046	22.1548			24.2525		24.4533			25.838	30.7377		32.6039	15.04	10.0629
2	2	56.7294	48.7294	44.3258	27.844	40.2395	37.6623	39.759	42.14	43.6828	28.1501	46.6942	33.1671	40.3867	38.6793	37.3184	44.6394	45.7851	40.0285								20.2605	24.6637	27.9039	38.3532	25.988	32.8571	25.1506	22.4571	25.1344	55.7641	23.8292	35.0374	38.3459	32.5472	29.6089	34.9903	26.281	37.6068
3	3	50.4052	43.4842	44.3574	24.6606	41.784	37.7246	42.097			36.9427	51.926	34.4111	37.8525	29.4491	36.7171	49.1557	49.6825	44.7581	58.4296	44.504	56.541	36.7647	23.9286	45.9799	40.5685	22.5284	25.7888	30.8777	44.9095	23.4742	29.7904	28.169			45.5414	22.4962	36.1432	37.2017	47.4576	29.6976	30.394	24.4444	28.8978	25.1732	30.0268	23.5033	17.1569	56.4286
4	4	51.0638	41.1837	43.5294	26.6432	38.5671	41.9858	38.5502	45.3608	49.2212	39.5904	54.0373	38.9011	39.8837	30.6931	39.1167	54.4211	49.3373	45.9038	65.252	37.5979	55.481	34.9876	29.4872	51.6892		22.7964	28.1134	29.7059	44.7183	22.7134	31.3475	30.6425	28.2769	26.0125	46.4164	23.913	32.3077	37.7907	48.5149	26.183	27.3473	25.0368	29.5189	18.0371	37.3368	22.8188	24.8139	55.1282
5	5	48.9569	38.7887	42.4023	25.0871	29.4753	45.3416	37.9427	44.5946	44.9915	37.5776	52.0868	36.4497	42.6893	33.8947	43.0052	56.7317	47.3239		54.5012	32.9146	53.6946	34.8974		41.4141		22.114	30.799	28.0753	45.18	21.7593	28.882	30.86	28.5285	26.8251	45.9627	31.5526	31.4793	35.7702	44.4211	25.6995	25.1625	26.338		26.0341	42.2111	21.4286	26.9795
6	6	46.0123	39.6675	46.53	26.7836		48.0539	40.7801	32.9493	45.9259	36.6438	48.8263	34.4789	36.7598	32.9718	40.1483	54.5195	40.9023	40.3439	59.4164	32.0879	62.2857	33.2353	32.8622	40.8304		19.8773	28.0285	27.918	38.8304		26.7964	25.7092	47.5806	26.6667	45.8904	34.4288	29.49	33.9665	43.6009	26.3771	27.6879	31.2782	32.9365	22.0159	41.978	17.7143	33.2353	46.9965
7	7	35.7471	38.2051	41.8605	26.8487	29.0419	46.7994	39.243	39.8551	49.1525	47.9885	53.6622	37.3291	40.3659	34.1719	43.4125	57.0874		33.2515	56.2857	33.3333	58.5434	36.6771	37.0107	49.4424		20.8046	29.7436	30.2326	35.2674	20.3593	28.3072	22.3108	39.9759	25.7319	38.7931	31.988	28.4963	34.6341	45.9119	23.5421	26.5049		46.0123	25.4286	40.7674	16.8067	37.931	45.1957
8	8	34.3238	39.0273	35.4839	26.9448	26.4336	48.3039	35.2705	45.3265	48.9221		52.984	34.5946		37.7729	42.0323	54.1463		30.647		36.5039			26.5487	39.779		20.3893	30.7236	30.8387	35.513	22.0979	26.3229	21.6433	35.3393	28.0265		35.5167	29.6216		40.1747	26.097	29.8537		47.6731		35.7326			48.0826
9	9	34.0019	43.2836	38.6301	28.5383	28.1726	49.3166	36.5462																			18.8157	27.899	28.4931	33.5267	21.4467	27.7904	20.0803
[truncated: 49 more columns]
