# Supplementary material for: Dynamic tracking of native precursors in adult mice
Source: eLife. 2024 Dec 5;13:RP97504. doi: 10.7554/eLife.97504 (PMC11620740; doi:10.7554/eLife.97504)
Supplement: Figure 4—source data 1. [file elife-97504-fig4-data1.xlsx]

## Sheet: Figure 4B
Table 1
	UT					5-FU
CMP	3.10547	2.95983	3.11296	4.02543		2.66944	2.56331	2.76872	2.73697	2.64224
GMP	3.18536	2.94939	3.0772	3.61134		2.48124	2.19111	2.82007	2.39514	2.58918
MEP	3.15018	2.91819	2.94085	3.60269		2.53882	2.60733	2.36763	2.52369	2.39639
MP	3.26422	3.04214	3.2119	3.47636		2.58359	2.69471	3.15165	2.52682	2.94433
HSPC	3.51242	3.04306	3.22818	3.34688		2.88849	2.65245	3.06971	2.92962	3.00722
LT-HSC	2.76659	2.5408	2.61314	2.51598		2.50866		2.49399	2.89214	2.70003
ST-HSC	2.41986	2.31333	2.60231	2.46193				2.51178	2.64639	2.10185
MPP2	2.94753	2.93381		2.97145		3.29504	2.4455	2.99817	2.525	2.79265
MPP3	3.00932	2.64911	2.74024	3.09028		2.41097	2.44639	3.02247	2.60973	2.81273
MPP4	3.27344	2.99011	3.20539	3.12639		2.46346	2.00101	2.58112	2.4874	3.62754

## Sheet: Figure 4D
Table 1
Average of biological replicates		B					T					M
1	1	7.14429	8.55833	9.96	9.9175	11.0875	3.67429	5.235	4.11	5.195	5.4075	7.86429	9.04333	10.5233	11.45	10.9325
2	2	8.12571	8.78143	10.3436			5.69714	6.7	7.48545			8.62	9.97571	11.7173
3	3	8.41429	9.28	11.016	12.175	12.382	6.66143	8.25667	9.239	10.125	11.154	9.3	11.79	13.135	14.3925	13.924
4	4	8.37	9.91167	11.0227	12.6375	11.6883	7.43143	8.07333	9.31273	11.32	10.6667	9.32286	12.0083	13.4418	14.6275	14.3
5	5	8.58714	10.1233	11.7927	13.71	12.5175	7.36143	9.17333	10.6118	12.535	11.2825	9.85571	12.2833	14.3291	15.0275	14.35
6	6	8.79857	9.98833	12.129	14.265	12.78	7.94429	9.62333	11.741	12.37	11.898	10.5043	13.7983	13.91	15.2525	14.278
7	7	8.82667	10.255	12.01	13.4225	12.845	8.02667	9.51167	11.1482	12.9925	12.19	10.425	11.8683	13.9818	14.8	14.1725
8	8	9.59	10.9071	12.0873	13.79	12.97	8.664	10.0029	12.1518	13.325	12.7867	11.222	12.1514	14.9882	15.6175	14.7033
9	9	10.522	11.5067	13.467	13.8025	14.205	9.912	10.8433	12.905	13.46	14.0025	15.874	12.7067	14.793	15.59	16.2575
All data points		B																																			T
1	1	6.08	6.54	7.05	7.61	6.8	7.16	8.77	5.72	9.25	7.75	11.53	8.29	8.81		8.6	9.75	11.53									8.56	8.39	11.28	11.44	10.84		11.28	11.11	11.12		2.6	2.86	4.11	4.06	3.87	4.07	4.15	4.51	5.02	5.24	6.92	4.58	5.14
2	2	7.45	7.6	8.63	8.79	7.14	8.55	8.72	7.14	9.2	8.52	10.22	8.28	10.02	8.09	10.51	10.88	11.03	9.46	11.5	11.48	9.36	11.39	7.24	11.01	9.92											4.84	5.1	5.72	6.66	7	5.44	5.12	5.21	6.81	6.63	8.48	5.35	8.23
3	3	6.92	7.29	10	8.86	7.7	8.8	9.33	5.9			11.71		10.23		10.21	10.55	11.21	10.04	12.24	12.01	9.27	11.74		11.45	11.44	10.65	9.94	12.78	15.33	10.82	12.59	12.73	12.7	13.07		5.03	6.05	6.87	7.53	6.78	7.05	7.32	5.85			9.19		9.73
4	4	6.98	7.8	9.44	8.5	7.33	8.43	10.11	6.57	9.83	9.74	13.69	8.62	11.02		10.38	11.32	11.78	11.18	11.92	11.93	9.25	12.21	7.79	11.44	12.05	10.86	10.25	13.27	16.17	10.26	12.32	12.87	11.58	11.88	11.22	5.73	6.63	8.3	7.77	7.19	7.82	8.58	5.6	7.71	8.66	9.39	6.84	10.24
5	5	6.87	8.18	9	8.99	8.99	9.09	8.99	7.34	9.85	10.04	13.49	8.99	11.03		11.16	11.51	13.49	11.28	14.1	11.71	10.2	13.13	7.89	12.48	12.77	12.24	11.1	13.43	18.07	11.96	13.32			13.45	11.34	5.73	7.56	7.83	8.11	7.41	6.96	7.93	7.33	8.63	8.63	11.58	7.18	11.69
6	6	7.29	8.09	9.03	9.2	9.39	9.22	9.37	6.23	10.09	10.22	13.66	9.52	10.21		11.47	12.47	13.41	10.86	13.32	13.17		12.95	8.1	13.02	12.52	13.05	11.07	13.35	19.59	12.57	12.72	13.6	11.61	13.4		6.51	8.38	8.21	8.72	8.35	7.52	7.92	6.54	10.04	8.84	12.77	7.87	11.68
7	7	6.87	8.54	9.88		9.82	9.28	8.57	7.59	9.57	10.2	12.95	10.9	10.32		10.71	12.94	13.13	10.43	14.27	13.53	11.03	12.71	7.93	13.39	12.04	12.57	10.22	11.76	19.14	12.25	12.8	14.13	12.2			6.51	8.1	8.43		9.41	7.72	7.99	6.47	8.43	9.78	11.48	9.47	11.44
8	8	10.19	10.36	8.9			8.46	10.04	10.33	9.5	10.56	13.64	11.02	10.93	10.37	11.32	11.59	13.07	10.54	14.83	13.38	10.59	13.28	8.83	12.94	12.59	12.9	10.79	11.91	19.56	12.03	12.94	13.94				9.36	8.79	9.03			7.23	8.91	7.64	10.56	9.29	11.14	10.07	11.74
9	9		8.88	11.1		10.83	12.14	9.66	10.21	11.03	10.98	13.02	12.6	11.2		13.69	13.21	13.97	11.38	16.25	16.19	11.92	13.96	11.27		12.83	13.38	9.8	12.14	19.89	14.46	13.95	13.96	14.45				7.18	11.9		10.55	10.35	9.58	8.98	10.54	10.46	11.77	11.15	12.16
[truncated: 49 more columns]

## Sheet: Figure 4E
Table 1
Myeloid		E11.5				E14.5				Adult
1	1					3.55842	3.03987
2	2	2.48365	2.75703			3.39301	3.28054	3.26526
3	3	2.81451	2.65068	3.02633		3.37157		3.4366	3.25797		3.82156	3.88062	3.84379
4	4	2.78152	2.83703	2.80554		3.5762	2.72774	3.32335	3.0399	3.54338	3.83077	3.76165	4.05709
5	5	2.8444	2.90757	3.02101		3.03428	2.91995	2.79599		3.81269		3.56239	3.81127
6	6	3.32857	2.70984	3.04736		3.08405	3.00012	2.76616	3.56095	3.64244	3.42816	3.67647	3.63413
7	7	2.77533	2.6047	2.84858		3.41168	3.25194	3.04155		3.51389	3.25826	3.41681	3.38728
8	8	2.83122	3.58144			2.96972	3.38505	2.81792		3.79141	3.04473	3.9018	3.63378
9	9					2.90396	2.99684	2.77522		3.25351	3.2414	3.44679	3.22558
B cell		E11.5				E14.5				Adult
1	1					3.60349	3.35516
2	2	2.50281	1.96755			3.20418	3.29077	3.2111
3	3	3.38491	3.03258	3.34514		3.06738		3.35278	2.91874
4	4	2.61467	3.10657	2.78152		3.01639	2.72454	3.29514	3.01704
5	5	2.62278	2.28765	2.8444		2.86742	2.68054	3.05065
6	6	2.6886	2.8198	3.32857		2.86864	2.50152	3.13196	2.76878
7	7	3.74825	3.13755	2.77533		2.7552	2.5183	3.18389
8	8	2.9695	2.74139			3.42072	2.56996	3.14711
9	9					2.96413	2.56085	3.1537
T cell		E11.5				E14.5				Adult
1	1					3.12344	2.59576
2	2	1.96755	3.66743			2.77745	3.07147	2.85475
3	3	3.03258	2.58949	2.57868		3.26941		3.1656	2.71657
4	4	3.10657	2.64214	2.43236		3.28406	3.14186	2.81745	3.14949
5	5	2.28765	2.61444	2.84334		2.93685	2.84123	2.85381
6	6	2.26147	2.54981	2.51645			2.73096	3.01065	3.30923
7	7	3.13755	2.61793	2.66099		3.08117	2.79685	2.74691
8	8	2.64982	2.78842			3.09391	2.61558	2.87807
9	9					3.3876	2.72068	2.77468

## Sheet: Figure 4F
Table 1
	UT					E11.5					E14.5
PB-Myeloid	3.25351	3.2414	3.44679	3.22558							2.90396	2.99684	2.77522
CMP	3.10547	2.95983	3.11296	4.02543		2.64493	2.19626	2.90632			2.41111	2.28786	2.66453
GMP	3.18536	2.94939	3.0772	3.61134		2.48401	2.18403	2.87641			2.33072	2.31496	2.58617
MEP	3.15018	2.91819	2.94085	3.60269		2.23404	2.19991	3.03632			2.55844	2.34132	2.76165
MP	3.26422	3.04214	3.2119	3.47636		2.52605	2.24896	3.12324			2.49122	2.36811	3.10992
HSPC	3.51242	3.04306	3.22818	3.34688		2.6049	2.35594	3.16815			2.65236	2.42409	2.99022
LT-HSC	2.76659	2.5408	2.61314	2.51598		2.48844	2.09743	2.69232			2.64904	2.48586	1.94907
ST-HSC	2.41986	2.31333	2.60231	2.46193		2.33487	2.42792	3.02463			2.42113	2.18649	2.02875
MPP2	2.94753	2.93381		2.97145		2.46065	2.20552	3.02562			2.52832	2.36031	2.80082
MPP3	3.00932	2.64911	2.74024	3.09028		2.42608	2.21463	2.77812			2.58732	2.41903	2.45446
MPP4	3.27344	2.99011	3.20539	3.12639		2.70774	2.38499	3.06649			2.41589	2.37172	3.1772

## Sheet: Figure 4G
Table 1
	E11.5	E14.5	Ganuza et al 2022 E12-14
6	3.68733	3.10801	10.0839
7	4.47911	1.44214
8	2.43557	3.43057
9		2.51082
CMP	5.22902	7.02134	2.40816
GMP	4.90917	6.24027	2.80842
MEP	4.60137	3.97352	2.70499
MP	4.12958	3.91053
HSPC	3.74087	3.92411
LT-HSC	1.52428	1.76931	3.26739
ST-HSC	0.713763	1.72677
MPP2	2.4378	2.44219
MPP3	2.50782	2.4283
MPP4	2.68594	3.11814
