# Supplementary material for: Dynamic tracking of native precursors in adult mice
Source: eLife. 2024 Dec 5;13:RP97504. doi: 10.7554/eLife.97504 (PMC11620740; doi:10.7554/eLife.97504)
Supplement: Figure 5—figure supplement 1—source data 1. [file elife-97504-fig5-figsupp1-data1.xlsx]

## Sheet: Panel A
Table 1
All data points		Fancc+/+
1	1	29.4056	26.8116	29.3626	22.0041	24.7132	28.4519	23.9334	21.6216	25.1566	23.1491	26.7987	26.1053	38.3286	42.3491	32.1875	28.9612	32.9127	28.2079	31.8182	32.2211				32.1839	39.4543	29.0698	40.0628	31.1321	27.3298	26.7503	29.979	27.9581	31.4465	37.4281			29.7326	32.0652	24.5386	31.6415	31.5183	30.1471	35.1891	33.1928	31.6177	36.017
2	2		31.4854		23.511	28.1087			34.4315			31.4737	31.524		37.2632	33.7487	23.5908	24.0876	35.2442	31.4076	23.9061	28.616	29.3264	24.8447	36.4035	32.6509	23.9014	39.6387	26.8162	40.8252	31.2232	31.9104	41.6129	34.3189	28.7066	37.224	35.518	28.3898	33.9226	19.0323	36.8826	28.8061			35.1852	26.8559	31.694	19.7906	32.234
3	3	28.0628	29.3501	26.3323	27.2823	28.8865	33.4027	32.6722	29.1579	26.2487	32.2445	36.9906	33.5774	26.2434	27.5488	29.606	27.4262	26.2827	30.6383	28.4091	26.9709	31.2169	28.9979	20.0422	34.5395	38.8769	32.9004			20.6099	22.7129	25.8439	29.1005	43.8095	25.3886		35.7294	36.7368	29.9793	17.5676	38.7029	35.8787	44.4329		30.9375	35.2261	38.0952	25.3669	25.1042
4	4	27.9959	28.3039	23.3955	24.1237	29.0456	27.2633	26.1283	29.0155	26.4033	25.262	35.5208	31.4374	30.095	28.4483	29.2657	26.0042	23.2949	34.728	25.0522	21.9873	29.9681	32.8076	20.7627	37.3569	28.8865	29.3684			39.3118	25.7829	22.7225	23.9875	36.8664	27.5026	42.5711	34.9451	29.9145	26.6805	16.5445	37.3362	36.1407		36.0566	36.1771	33.0097	39.1631	21.527	31.8182
5	5	33.545	34.9257	36.4629	35.5532	32.2176	31.524		31.348	41.0638	31.4406	34.2918	28.0127	30.1554	40.1483	29.2553	27.3114	29.4606	27.9831	26.7913	29.3375	29.2017	29.7718	30.2495	35.6371	34.6154	35.2128	38.2888	38.8403	24.5283	27.3013	29.6925	36.3541				36.0125	33.4426	33.9979	23.2877	34.7003	33.8641	32.3467		29.0832	33.3333	32.2034	28.2402	31.0053
6	6		38.5021	35.5789	36.0759	30.7128	29.8899	37.9919	26.4612	23.0277	22.1519			25.7895		21.6017			29.8396	26.7368	37.6749	25.1068	27.8602		30.2006			29.5047			28.9144	28.434	29.9894				29.7125	35.6092	38.7734	24.2456					28.3316	34.1463	36.0502		26.1173
7	7	30.1042	26.1186	28.2586		27.0011	23.5648		21.9178	32.6134	26.114		39.7802				34.2797	37.5	33.9917	27.673	29.1355		26.4108	34.4538	27.1865			28.8627			31.6119	34.9067	24.789				36.8254								26.803	28.4055	27.5424		32.3424
Average of Biological Replicates		Fancc+/+							Fancc+/-							Fancc-/-
1	1	25.6261	33.3733	32.0723	31.566	27.1275			27.0854	24.2874	26.6587	34.0555	32.4408	32.2644	29.4519	23.9843	27.2467	33.7678	31.3385
2	2	30.089	29.2035	33.9038	29.2793	32.4559			28.9497	30.7803	27.9369	32.0761	31.4322	32.2022	30.4836	26.5022	28.7633	29.293	31.9622
3	3	30.3507	27.5802	30.9512	32.548	28.2251			27.7426	29.2393	28.8117	30.2976	32.6909	30.4329	28.4971	26.3757	26.3038	26.4329	27.8305
4	4	27.8246	27.4922	31.7547	31.838	30.0261			28.3444	28.0878	29.18	28.6183	30.0743	30.1298	29.2717	25.4826	30.7291	29.464	29.188
5	5	33.6714	29.9696	33.6483	31.2546	30.8084			33.5441	33.9978	31.8114	29.4337	32.0252	30.7432	32.9518	25.6823	27.2023	28.8548	29.1024
6	6	31.1547	27.8014	29.4593	31.8823	32.7579			34.5946	31.4828	30.026	27.0784	32.4334	28.5697	32.2316	26.2277	29.3521	31.3069	31.3056
7	7	28.3859	31.9206	30.697	28.8284	31.5628			29.1042	29.8475	34.7558	31.8853	34.9408	33.4988	32.8261	28.7603	33.6859	32.3684	29.1967
[truncated: 165 more columns]

## Sheet: Panel B
Table 1
All data points		Fancc+/+
1	1	48.3837	60.6625	55.4859	58.9876	51.9291	59.4142	65.0364	64.7609	55.9499	53.2847	57.2471	53.8947	51.5237	44.181	57.0833	51.7314	47.8444	53.7646	53.1713	47.7581				53.605	45.0157	48.4144	46.9665	53.6688	57.5916	60.6061	56.499	53.5078	56.1845	52.9012			55.4011	44.0217	48.6428	54.4276	56.3351	57.7731	52.8361	54.8999	52.2059	45.7627
2	2		55.8577		52.7691	44.5141			44.8459			49.7895	52.5052		47.1579	52.9595	53.3403	55.4744	45.7537	54.2017	54.5358	52.2373	58.9637	54.5549	40.3509	47.7371	57.2347	46.6525	56.1966	38.9794	53.3262	53.5752	42.043	48.2577	56.572	48.1598	50.74	54.2373	48.1768	59.4624	39.8463	47.3165			45.4248	41.4847	39.6721	62.6178	53.1915
3	3	50.6806	55.3459	59.7701	47.3242	42.437	54.7347	55.1148	53.7895	43.3581	41.3066	45.0366	47.4895	59.4709	52.3861	52.6092	55.5907	59.267	55.4255	58.6777	54.6681	50.2645	55.3305	60.9705	40.0219	41.6847	40.6926			61.7245	64.4585	60.3376	58.836	42.1164	60.1036		51.2685	44.8421	55.083	64.9688	48.0125	48.2218	43.2882		55.1042	43.2177	36.5079	55.5556	59.6875
4	4	48.1405	59.2092	65.0104	55.6701	49.6888	60.77	64.133	57.6166	55.3015	46.5409	49.1667	52.9473	57.339	48.7069	46.5443	52.8541	58.1322	47.5941	63.048	59.0909	48.2465	53.8381	59.0042	46.2019	55.7773	55.3684			42.6486	58.4551	60.733	60.8515	55.2995	61.117	46.2592	55.4265	52.2436	59.3588	63.7696	47.0524	46.9083		50.1089	47.1922	44.6602	36.6953	56.6278	54.2355
5	5	43.2804	48.9384	46.7249	34.5865	49.1632	58.3507		57.4713	34.3617	48.265	48.8818	56.2368	58.7565	46.928	52.3404	48.7779	55.9129	54.5934	59.9169	49.632	49.2647	59.3361	53.1185	47.3002	51.0684	50.6383	46.631	45.0766	59.1195	60.251	53.5525	49.8419				51.5658	47.2131	50.1574	57.9557	49.9474	48.62	53.277		53.8462	39.2094	41.9492	50.5796	53.1217
6	6		48.2067	52.9474	45.5696	52.4109	60.7236	54.6916	62.3805	54.1578	53.9029			63.4737		62.4868			53.7968	61.3684	39.5048	55.1282	59.7458		50.5808			54.7945			59.8121	61.7813	56.7054				54.9521	49.5798	45.842	54.4225					58.2371	37.4337	34.3783		54.7486
7	7	50.4167	56.9199	59.854		56.3501	66.1269		60.274	45.6803	53.4715		48.6813				48.7908	45.063	55.0936	58.0713	43.7567		64.4795	51.6807	54.5838			55.0429			58.1116	57.4138	55.0633				49.9471								56.7277	50.5808	47.1398		50.2973
Average of Biological Replicates		Fancc+/+							Fancc+/-							Fancc-/-
1	1	57.0864	50.8822	53.1782	52.2306	54.2589			55.4134	58.7037	56.8174	51.3719	53.1819	51.1572	54.9586	59.1996	55.7563	49.7097	52.2799
2	2	50.0469	52.9179	49.2173	49.143	47.1773			47.7147	49.6446	52.8489	52.8534	51.6256	51.0006	53.9957	55.4121	51.4917	52.0371	48.6468
3	3	49.699	55.8782	52.1244	50.4081	52.7435			51.6775	49.8915	54.1489	52.5532	49.9038	51.7485	55.384	55.8467	54.4407	57.5742	50.5523
4	4	55.3496	54.0362	54.3762	51.3089	50.0991			52.3897	53.3313	54.2064	56.2019	54.1118	53.0628	52.5652	57.8012	53.6961	55.3352	51.1106
5	5	47.8419	53.507	51.5045	50.5051	49.6487			47.2049	45.8819	49.204	55.9322	52.99	52.1984	48.2871	56.4449	55.5255	56.3491	52.7373
6	6	53.8879	56.5006	56.4377	48.4432	48.9454			47.7068	50.8393	53.0826	57.4074	51.9266	54.1325	51.9963	57.2166	55.2014	51.1559	51.7636
7	7	55.3083	52.4194	55.0271	53.7501	52.5266			53.2583	52.3119	50.4713	55.2906	50.6818	51.1437	48.7896	57.7569	52.2022	52.1162	54.1416
[truncated: 165 more columns]

## Sheet: Panel C
Table 1
WBC	Fancc+/+	Fancc-/-		RBC	Fancc+/+	Fancc-/-
	1210	822			951	906
	1040	1352			913	916
	1346	1039			886	755
	1836	1309			938	968
	1139	1938			942	929
	1386	1234			943	985
	1334	1597			913	986
	1609	1626			943	979
	1237	1407			1011	891
	1173	1188			962	965
	1309	1485			901	1070
	1123	1270			972	945
	843	1349			945	979
		753				711
		1989				929
		1173				827
Platelet	Fancc+/+	Fancc-/-		Neutrophil	Fancc+/+	Fancc-/-
	1281	785			121	104
	1200	1040			56	153
	1491	1251			130	124
	824	1218			101	112
	1362	1344			102	191
	1353	1136			108	142
	984	1045			95	145
	1452	1237			102	174
	1190	1206			127	158
	1456	1370			75	116
	1548	1231			114	139
	1433	1082			152	87
	1534	1411			115	105
		55				59
		1562				173
		437				97
Lymphocyte	Fancc+/+	Fancc-/-		Monocytes	Fancc+/+	Fancc-/-
	998	680			72	23
	884	1025			69	145
	1093	832			94	56
	1579	1090			133	66
	895	1545			116	156
	1147	926			103	116
	1052	1253			145	157
	1357	1287			127	137
	992	1088			102	105
	929	945			115	109
	1041	1208			128	119
	824	1056			112	100
	686	1133			34	92
		610				64
		1603				166
		952				99

## Sheet: Panel D
Table 1
LT-HSC-all data points	Fancc+/+	Fancc+/-	Fancc-/-	ST-HSC-all data points	Fancc+/+	Fancc+/-	Fancc-/-	MPP2-all data points	Fancc+/+	Fancc+/-	Fancc-/-	MPP3-all data points	Fancc+/+	Fancc+/-	Fancc-/-	MPP4-all data points	Fancc+/+	Fancc+/-	Fancc-/-
	0.031	0.031	0.022		0.00989	0.021	0.00757		0.00742	0.014	0.012		0.014	0.046	0.039		0.048	0.098	0.096
	0.021	0.035	0.027		0.027	0.026	0.012		0.00191	0.013	0.013		0.024	0.044	0.026		0.12	0.1	0.12
	0.023	0.03	0.017		0.02	0.023	0.00939		0.00437	0.00837	0.00604		0.027	0.04	0.013		0.12	0.14	0.11
	0.045	0.036	0.036		0.016	0.023	0.014		0.012	0.00707	0.00834		0.022	0.026	0.015		0.12	0.1	0.066
	0.044	0.035	0.017		0.023	0.031	0.011		0.00895	0.012	0.00566		0.018	0.048	0.017		0.058	0.1	0.07
	0.025	0.026	0.022		0.032	0.016	0.00435		0.00714	0.00681	0.019		0.04	0.017	0.031		0.14	0.062	0.077
	0.079	0.039	0.013		0.041	0.052	0.00182		0.019	0.011	0.00817		0.062	0.076	0.00817		0.19	0.098	0.077
	0.028	0.029	0.00925		0.025	0.036	0.00204		0.00663	0.00903	0.00701		0.032	0.071	0.00808		0.15	0.087	0.056
	0.031	0.04	0.019		0.026	0.036	0.00533		0.00598	0.00807	0.00802		0.026	0.036	0.02		0.11	0.11	0.071
	0.022	0.041	0.018		0.00835	0.039	0.00366		0.00437	0.017	0.017		0.00848	0.065	0.013		0.079	0.18	0.12
	0.017	0.047	0.033		0.011	0.034	0.019		0.00271	0.01	0.01		0.00558	0.061	0.029		0.056	0.19	0.13
	0.026	0.04	0.012		0.018	0.033	0.012		0.00422	0.00641	0.015		0.00745	0.032	0.024		0.037	0.11	0.083
	0.029	0.042	0.027		0.031	0.028	0.013		0.00761	0.00646	0.016		0.03	0.029	0.047		0.13	0.12	0.12
	0.033	0.035	0.026		0.023	0.033	0.00936		0.00527	0.00577	0.00468		0.015	0.027	0.014		0.083	0.12	0.18
	0.033	0.035	0.051		0.011	0.023	0.011		0.01	0.00421	0.019		0.013	0.015	0.017		0.13	0.14	0.13
	0.031	0.024	0.052		0.021	0.028	0.018		0.00773	0.00812	0.027		0.03	0.027	0.048		0.13	0.11	0.12
	0.033	0.031	0.032		0.02	0.02	0.011		0.012	0.00424	0.017		0.03	0.013	0.04		0.14	0.12	0.19
	0.04	0.014	0.046		0.027	0.0047	0.015		0.011	0.00597	0.016		0.021	0.00968	0.033		0.17	0.09	0.17
	0.043	0.014	0.051		0.012	0.00535	0.013		0.016	0.00478	0.025		0.019	0.00586	0.037		0.18	0.088	0.24
	0.059	0.013	0.026		0.02	0.00455	0.024		0.02	0.005	0.00696		0.025	0.0049	0.031		0.13	0.079	0.13
	0.025	0.021	0.028		0.017	0.00869	0.00672		0.00872	0.00774	0.0094		0.023	0.014	0.022		0.16	0.077	0.14
	0.023	0.033	0.028		0.025	0.00832	0.00408		0.00367	0.017	0.012		0.024	0.014	0.018		0.1	0.1	0.13
	0.024	0.016	0.049		0.013	0.00467	0.019		0.012	0.006	0.013		0.024	0.00514	0.039		0.15	0.073	0.2
	0.029	0.016	0.024		0.00934	0.00733	0.016		0.00766	0.011	0.011		0.016	0.016	0.041		0.16	0.091	0.13
	0.041	0.024	0.047		0.021	0.018	0.00754		0.021	0.0085	0.012		0.034	0.025	0.013		0.13	0.093	0.13
	0.049	0.069	0.035		0.028	0.047	0.00909		0.028	0.012	0.011		0.068	0.047	0.015		0.21	0.11	0.14
	0.055	0.039	0.036		0.02	0.022	0.00996		0.00676	0.00995	0.014		0.011	0.028	0.019		0.12	0.067	0.12
	0.041	0.038	0.043		0.016	0.03	0.00514		0.011	0.0064	0.015		0.017	0.027	0.013		0.13	0.13	0.17
	0.038	0.038	0.029		0.015	0.035	0.013		0.011	0.012	0.01		0.024	0.053	0.023		0.13	0.17	0.098
	0.038	0.036	0.028		0.016	0.037	0.00865		0.00594	0.00557	0.00433		0.00865	0.031	0.0092		0.094	0.14	0.11
	0.062	0.037	0.015		0.017	0.032	0.00258		0.011	0.00903	0.00852		0.028	0.032	0.00731		0.16	0.13	0.093
	0.033	0.04	0.02		0.019	0.037	0.00197		0.00518	0.00821	0.00976		0.014	0.034	0.00889		0.083	0.14	0.1
	0.032	0.043	0.015		0.00514	0.041	0.00201		0.00396	0.018	0.011		0.00662	0.081	0.00682		0.076	0.15	0.091
		0.05	0.019			0.031	0.00215			0.00867	0.00652			0.047	0.00747			0.094	0.066
		0.028				0.024				0.00453				0.027				0.14
		0.039				0.017				0.00941				0.014				0.15
		0.031				0.01				0.011				0.02				0.18
		0.028				0.018				0.013				0.029				0.19
		0.031				0.029				0.00699				0.029				0.17
		0.045				0.014				0.012				0.022				0.18
		0.047				0.021				0.014				0.046				0.2
		0.047				0.015				0.033				0.053				0.34
		0.052				0.023				0.0073				0.019				0.18
		0.043				0.02				0.00959				0.022				0.17
		0.053				0.029				0.00552				0.016				0.13
		0.048				0.018				0.00818				0.013				0.16
		0.04				0.013				0.00654				0.00971				0.12
		0.053				0.013				0.00955				0.017				0.16
LT-HSC-average of biological replicates	Fancc+/+	Fancc+/-	Fancc-/-	ST-HSC-average of biological replicates	Fancc+/+	Fancc+/-	Fancc-/-	MPP2-average of biological replicates	Fancc+/+	Fancc+/-	Fancc-/-	MPP3-average of biological replicates	Fancc+/+	Fancc+/-	Fancc-/-	MPP4-average of biological replicates	Fancc+/+	Fancc+/-	Fancc-/-
	1	1	1		1	1	1		1	1	1		1	1	1		1	1	1
	0.0363333	0.0353636	0.020025		0.0244322	0.0306364	0.007116		0.00815556	0.0105773	0.010424		0.0294444	0.0481818	0.019025		0.117333	0.115	0.0863
	0.0266667	0.0345	0.0366667		0.0170583	0.0275	0.0134844		0.00569667	0.00586833	0.0166311		0.0132517	0.0238333	0.0321111		0.0858333	0.12	0.151444
	0.0385	0.018875	0.0351111		0.0195	0.00770125	0.0112811		0.012575	0.00824875	0.0115956		0.0246667	0.0118225	0.0234444		0.151667	0.086375	0.143333
	0.0332	0.0433333	0.021		0.019268	0.0346667	0.00506		0.014466	0.00998111	0.008355		0.0332	0.0422222	0.0104483		0.15	0.125667	0.093
	0.0427143	0.0315			0.0154486	0.01725			0.00783429	0.009485			0.01561	0.0225			0.113286	0.165
		0.0459				0.0195				0.011267				0.024671				0.181

## Sheet: Panel E
Table 1
Fancc+/+	Fancc-/-
43500000	29500000
50750000	29750000
71250000	41000000
72250000
64750000	53500000
42500000	70750000
57500000	72500000
59500000
33250000	31500000
33500000	37750000
26250000	46500000
33000000	40000000
	27750000
	27750000

## Sheet: Panel F-left
Table 1
All data points		Fancc+/+
1	1	55.4404	56.25	59.8886	55.8583	54.9451	54.5752	57.2603	61.7866	54.047	54.6835	58.5124	57.9208	57.6687	58.4288	56.4644	57.3196	56.1039	57.3696	52.0115	55.8886				56.6964	51.746	53.3505	54.2017	53.8922	54.6906	51.1952	52.5532	54.0041	55.5024	55.5556			53.0303	52.7383	54.6154	59.383	56.541	57.1429	52.0221	56.75	56.7677	55.0541	54.1748
2	2		56.8047		59.8291	58.1522			57.9462			56.8649	57.3129		57.0435	63.9896	58.4192	50.8032	56.6092	54.9367	53.6273	55.7057	55.3371	55.9896	53.3537	54.2416	52.9981	56.25	48.9796	59.4017	58.9569	56.6125	60.686	61.4065	54.918	58.6855	60.2581	56.962	58.7591	75.7282	52.7311	59.1195	54.7794			51.7921	57.2741	56.5766	54.4828
3	3	56.0185	52.5424	58.8028	56.1093	52.2358	60.628	61.4644	59.0909	61.235	57.7236	55.7636	53.4954	55.3738	53.4611	57.6642	52.4615	61.9289	54.7677	58.1897	58.447	54.6358	57.5	55.9767	56.4327	55.6675	56.6038			59.8579	57.2383	58.134	59.2593	59.4675	61.1765		62.4138	37.224	58.1169		62.2889	57.767	58.6797	56.0748		57.0833	55.4902	60.2389	58.567
4	4	55.1429	54.0425	54.8032	54.7305	54.3403	55.5785	58.7436	63.4185	63.2479	56.3867	51.3558	56.6265	56.5611	56.1181	55.615	59.5491	57.8778	59.9119	57.9766	55.4517	57.7381	61.2472	50.4622	58.6572	52.6042	51.7442			57.9646	50.6757	55.1948	58.2623	59.7132	52.9774	57.3394	60.1	46.2287	56.9157	70.3125	57.2901	58.3493	60.0783		58.8608	54.6848	56.4426	56.4945	50.2901
5	5	58.589	59.0909	56.3088	58.5562	55.3271	54.3379		63.1485	58.4229	59.4987	55.032	53.5161	45.5399	55.6144	54.7107	52.9988	53	57.3951	54.5752	53.5363	53.9109	54.4248	57.8231	60.597	48.3092	58.9965	54.8052	55.6738	53.4918	57.8856	57.3413	57.6302				60.4055	44.4744	58.4933	71.0345	57.7629	59.3148	57.2597	55.7895		53.2174	56.6667	54.1245	54.6332
6	6		58.3149	57.963	57.4468	57.4639	57.7011	60	66.25	54.5455	58.2799			51.3458		60.4336			58.9744	57.754	57.6439	58.2508	52.4715		58.9744			54.3529			53.4579	58.952	69.1542				58.9223	44.5122	65.7862		56.9157					54.4042	56.1848	61.498
7	7	59.3052	57.1142	56.9805		54.9435	51.0288		61.6279	54.2243	58.7786		56.9161				53.8703	60.8696	59.4059	51.89	59.1371		48.4962	56.462	59.4286			57.0333			52.2727	63.1111	55.6657				61.3225									63.1136	56.196	64.0224
Average of biological replicates		Fancc+/+							Fancc+/-							Fancc-/-
1	1	56.764	56.4069	53.9444	55.2927	55.492			56.0477	55.827	55.5181	58.4169	54.7657	54.0218	56.1762	57.811	56.341	55.2461	56.22
2	2	57.8183	56.2461	56.6729	57.8778	58.2433			58.3724	57.5894	58.0141	57.9852	56.0702	55.666	52.2883	59.7769	57.4704	55.3613	52.0515
3	3	57.0925	56.4006	58.6251	56.3958	56.3756			59.9211	57.7778	57.8344	56.9857	57.004	55.6647	50.4971	58.4029	57.7784	56.3935	55.2013
4	4	56.5347	57.1372	55.9303	56.3885	57.816			56.55	57.6395	57.8956	55.5283	56.9721	56.4331	57.249	56.1252	59.2019	57.2444	56.7324
5	5	57.4389	53.9572	56.5136	56.3526	58.2939			58.2096	58.1684	60.3504	55.6667	58.1205	59.1956	59.138	58.0042	60.1646	58.3666	54.8033
6	6	58.6628	56.6963	58.9689	56.1922	59.924			57.6702	57.6824	60.0682	56.8042	57.5442	58.4658	57.4355	56.3506	58.1121	57.6941	56.7154
7	7	56.7688	55.733	58.139	58.7712	59.1521			57.3068	55.2285	60.2112	56.5055	58.3851	57.4903	55.8399	58.835	59.7342	57.9558	58.1889
[truncated: 166 more columns]

## Sheet: Panel F-right
Table 1
All data points		Fancc+/+
1	1	56.1798	65.5172	55.5556	62.5	62.6866	60.3774	55.7377	61.194	57.6923	59.0361	57.8947	55.3846	48.75	60.2564	68.4931	54.7445	58.3333	53.8462	51.3513	57.6271				64.2857	51.7857	56.25	53.7037	57.1429	63.4146	61.8182	47.5	57.8947	62.7907	57.7181			58.8235	51.2195	88.421	53.0612	61.1111	57.1429	56.5217	60.9375	57.7778	58.209	48.718
2	2		56.044		59.1837	62.7737			65.5172			57.971	62.8415		55.1351	75.2688	55.7692	62.5767	55.4348	61.017	51.497	54.4186	56.8807	54.8117	57.4074	63.6364	51.25	63.7931	53.125	57.971	58.3333	54.2553	60	59.7403	59.1549	53.5714	65.3226	59.1837	51.3333	97.861	59.4828	56	52.4272			56.6176	61.2613	45.3608	60.7143
3	3	58.75	59.5745	60.0917	56.229	63.5359	61.6667	65.3333	77.3438	65.9091	62.8415	60.7595	63.2867	55.3957	57.1942	71.0145	55.9259	61.2782	62.1622	50.5376	56.8182	58.3607	58.8608	55.2239	64.2857	60.215	58.3333			58.5859	61.5385	53.9007	56.6265	58.0913	55.2		63.5593	54.5455	62.5984		57.971	59.8425	51.8518	53.3333		51.9231	52.6316	50.6024	56.1798
4	4	57.1429	54.6763	56.8421	61.1487	56.4103	62.3037	67	73.9394	64.4195	62.9464	52.5157	54.4851	57.3864	57.7049	70.3704	58.1395	55.9485	60.8434	58.3333	58.0247	54.66	58.9744	56.2393	66.9725	54.8673	47.2362			56.8965	57.672	56.3536	59.0909	54.7278	57.0552	62	60.8407	59.2593	62.2283	86.9565	60.9849	68.1818	55.0926		53.2609	56.6308	54.0323	54.5024	52.6316
5	5	56.5069	60.6383	58.0756	53.4483	58.4838	60.3352		71.1957	62.2074	56.4516	52.0151	51.6373	58.0808	57.9221	67.4641	57.4742	59.2992	52.1277	54.6798	56.5134	59.6422	59.7345	57.6453	63.7037	59.0551	49.6154	58.2822	59.8214	55.336	59.2437	53.5211	59.6491				61.9718	68.8889	60.8201	89.4737	56.0897	66.0633	52.0979	55.5985		51.3812	48.6755	52.5097	59.3407
6	6		64.0187	56.9132	57.868	61.6715	62.1891	65.0519	68.2692	62.8141	59.0778			57.8947		62.7706			56.71	53.6232	57.6182	58.0705	62.4		60.3659			54.0107			57.8397	63.4686	59.5628				62.3298	62.3188	64.9156		53.9589					57.1429	57.9515	61.3861
7	7	66.1058	68.1614	59.8854		55.0265	60.4839		64.0909	58.8865	53.23		57.8838				60.8621	62.089	58.5254	55.9091	56.8245		59.2477	59.9206	60			55.9633			56.8965	70.6714	56.0724				63.9676									62.963	53.598	60.2041
Average of biological replicates		Fancc+/+							Fancc+/-							Fancc-/-
1	1	59.1463	56.6753	57.664	59.2676	57.4418			57.8464	58.7933	56.4266	56.2211	57.5593	57.4669	57.7521	57.6847	58.0195	59.5929	62.4574
2	2	60.7219	58.281	58.2739	59.8306	61.8694			59.3425	58.8811	63.3338	58.0884	57.0399	58.4086	61.487	62.3254	62.3309	58.6323	50.4447
3	3	62.9435	58.4338	59.0336	55.4095	59.0607			61.5601	58.8122	63.6203	58.1942	57.7304	59.1743	58.7565	63.762	60.9032	59.1485	51.7781
4	4	60.3192	58.7841	57.6102	60.074	59.091			62.0883	59.0658	60.1567	57.7385	57.3782	60.0245	61.794	62.7412	58.7997	61.5613	61.0714
5	5	58.2723	58.2348	58.02	58.9152	64.1524			60.6421	59.3291	62.2266	57.5881	58.196	60.2699	62.5355	63.2673	60.578	60.8311	55.94
6	6	61.9859	58.441	59.5963	59.0466	60.0723			58.737	58.3093	61.0593	57.3853	57.9699	61.0059	63.7522	62.3264	57.1678	61.9329	53.4767
7	7	60.4171	59.054	60.5952	57.1962	59.0754			57.3499	57.3271	62.6274	56.6159	61.3597	58.2721	60.5705	61.3381	56.7558	58.2372	56.5007
[truncated: 165 more columns]
