# Supplementary material for: Dynamic tracking of native precursors in adult mice
Source: eLife. 2024 Dec 5;13:RP97504. doi: 10.7554/eLife.97504 (PMC11620740; doi:10.7554/eLife.97504)
Supplement: Figure 5—figure supplement 2—source data 1. [file elife-97504-fig5-figsupp2-data1.xlsx]

## Sheet: Panel A
Table 1
	Fancc+/+ or Fancc+/-					Fancc-/-
LSK	0.46	0.52	0.43	0.38	0.54	0.54	0.47
LT-HSC	0.023	0.031	0.034	0.027	0.043	0.032	0.027
MPP2	0.028	0.039	0.028	0.027	0.046	0.05	0.058
MPP3	0.047	0.09	0.083	0.062	0.074	0.13	0.11
ST-HSC	0.017	0.028	0.034	0.025	0.032	0.024	0.013
MPP4	0.27	0.26	0.19	0.18	0.25	0.26	0.22

## Sheet: Panel B
Table 1
Average of Biological Replicates	Fancc+/+ or Fancc+/-			Fancc-/-
	1	1		1	1
MP	79.7667	84.7	82.7333	46.3833	49.5333	55.5556
HSPC	80.3889	86.3556	81.9333	49.75	53.7111	59.6556
LT-HSC	79.7444	85.3778	80.4556	41.3167	39.2889	60.0444
ST-HSC	81.8	89.0556	85.0444	49.8167	47.7667	59.9333
MPP2	77.7222	84.8444	81.3667	51.0833	52.9556	50.6889
MPP3	81.7889	88.2222	84.4889	52.3833	54.4889	57.2111
MPP4	81.3778	86.4333	82.4556	49.7333	57.6889	57.6778
All data points	Fancc+/+ or Fancc+/-																												Fancc-/-
MP	82.5	97.1	87.5	68.2	86.9	78.2	86.2	55	76.3		85.5	88.9	90.8	86.7	81.3	89.2	84.4	82	85.6	86.5	83.6	88.3	81.6	71.5	77.6	86.4	85.9	71.1	61.9	24.4	57.3	63.7	42.6	96.1	26.5	30.6	55.1	37	69.3	72	35.6	18.6	33.4	65.7	83	42.4	48	33	46.3
HSPC	82.4	95.6	86.5	70.2	88	78.7	89	57	76.1		85.7	91.3	91.5	80.5	86.3	89.1	86.2	83.4	83.9	92.1	85.5	88.1	79.8	69.4	76.1	84	86	75.7	67.1	31.2	57.4	75.2	42.2	89.4	34.7	36	52.8	43.6	67.8	77.2	41.6	25.2	40.5	70.5	77	44.7	53.5	38	55.2
LT-HSC	79.7	91.7	71.6	80.3	88.9	74.6	87.4	64.8	78.7		84.3	91.2	81.2	57.5	88.5	89.6	88.1	85.5	71	94.2	91.1	81.7	84.1	74.9	81	88.2	72.2	88.2	76	31.5	27.6	51.7	26.6	52.4	20.2	22.2	24.6	36.2	57.4	68.7	42	29.5	34.9	77.2	59.4	40.5	82.5	31.1	65.2
ST-HSC	78.9	98.6	84.5	79.7	86.5	79.7	92.6	60.7	75		84.8	95.1	95.1	89	88.1	90.6	88.1	83.4	82.6	94	88.4	92.4	77.1	67.3	80.7	92.9	91.6	85.7	76.9	28.7	45.4	54.1	38.4	94.9	31.9	18.6	48	52.1	74.6	65.3	42.3	18.2	39.4	82.3	86	46.5	72.3	42.6	49
MPP2	82.6	95.1	82.2	63.4	86	79.6	83.2	54.5	72.9		85	90.4	91.3	82.9	87.6	88.7	87.3	82.1	83.5	88.4	81.3	86.3	81	66.5	70.9	83.6	83.8	75.3	74.8	29.7	57.3	77	36.7	88.6	30.6	35.1	51.1	44.2	71.6	75.8	44.1	26.8	39.7	74.3	79.9	31.4	65.1	25.5	41.9
MPP3	84.1	96.9	88	69.4	88.1	80.1	90.1	60.9	78.5		86.1	93.7	94.8	87.9	86.4	91.4	88.1	85.2	88.8	91.7	85.4	90.2	84.2	71.6	77.3	86.9	86.6	78.1	70.1	31.5	59.5	76	44.9	94.5	32	39.5	53.8	46.4	73	75	42.1	25.7	40.7	72.7	84.5	48.9	64.9	34.1	45.6
MPP4	83.6	95.8	91.3	69.9	89.4	80.2	91.4	55.3	75.5		86.6	90.9	93.9	86.6	86.3	88.7	85	82.6	88.3	92.6	83.5	89	78.8	71.6	77.4	80.9	86.8	70.5	58.3	31.4	67.4	72.1	55.4	95.8	39	41	57.8	43.2	66.7	83	40.6	23.6	42.3	61.2	80.6	43.8	56.9	36.6	51.8
[truncated: 3 more columns]

## Sheet: Panel C
Table 1
		Fancc+/+ or Fancc+/-			Fancc-/-
1	1	2.52904	2.7875	2.29632	2.50062	2.76783	2.49595
2	2	2.18461	2.07483	2.13976	2.97915	1.7902	2.96744
3	3	2.06402	2.19319	2.57217	3.19495	1.59073	2.34465
4	4	1.88977	2.28171	2.62342	2.84588	1.41954	1.39839

## Sheet: Panel D
Table 1
		Fancc+/+ or Fancc+/-			Fancc-/-
1	1	1.80731	2.4608	1.78544	2.42863	1.19625	1.24113
2	2	1.99787	1.96266	1.63045	1.55875	1.63756	1.63082
3	3	1.6722	2.27861	1.85463	1.8852	2.22829	1.59143
4	4	1.70269	1.88585	1.95843	1.89778	2.08079	1.62216

## Sheet: Panel E
Table 1
	Fancc+/+ or Fancc+/-			Fancc-/-
LK	1.75587	1.44397	1.47209	1.35451	2.00625	2.46096
LSK	1.77272	1.37634	2.43049	1.29309	1.45253	1.73661
LT-HSC	1.87396	1.44468	1.27944	1.62821	1.93942	1.61693
ST-HSC	1.97751	1.37052	1.78011	1.25022	1.67574	1.61679
MPP2	1.68634	1.29031	1.55204	1.19232	1.45069	1.66337
MPP3	1.68775	1.40315	1.7084	1.24729	2.08878	1.81579
MPP4	1.69762	1.27107	1.84131	1.29496	1.89458	1.80482

## Sheet: Panel F
Table 1
	Fancc+/+			Fancc-/-
LSK	0.14	0.24	0.25	0.18	0.22	0.28
LT-HSC	0.031	0.045	0.044	0.022	0.027	0.054
MPP2	0.00742	0.012	0.01	0.012	0.013	0.00837
MPP3	0.014	0.022	0.037	0.039	0.026	0.031
ST-HSC	0.00989	0.016	0.02	0.00757	0.012	0.033
MPP4	0.048	0.12	0.12	0.096	0.12	0.12

## Sheet: Panel G
Table 1
	Fancc+/+			Fancc-/-
1	2.30514	2.07735	2.62818	1.64179	1.93244	1.81496
2	2.04419	2.16589	2.48154	1.5159	1.46117	2.13779
3	2.13223	2.78309	2.0704	1.17741	1.38917	2.3841
4	2.00148	2.03148	1.75424	1.185	1.35251	2.478
5	2.09244	1.96634	1.83613	1.19988	2.9737	2.20989

## Sheet: Panel H
Table 1
	Fancc+/+			Fancc-/-
1	2.40219	1.95793	2.22032	1.84795	2.08061	1.64675
2	1.81072	1.88584	2.41974	1.82572	1.90902	1.5089
3	2.0724	1.87189	3.22776	1.44427	1.70998	1.41533
4	2.0891	1.96759	2.26301	1.29127	1.3744	1.46181
5	1.58267	2.06069	2.12526	1.11144	1.4638	1.55465

## Sheet: Panel I
Table 1
Average of biological replicates	Fancc+/+			Fancc-/-			KO
	1	1		1	1		1	1
LK	89.5889	79.98	92.71	50.7	72.4875	72.2778
LSK	89.2889	79.21	92.38	52.3875	75.1625	73.2778
LT-HSC	92.6444	83.18	92.4	52.25	79.575	82
ST-HSC	92.5111	85.17	91.58	53.3	82.2125	71.9667
MPP2	88.6556	80.91	91.05	54.1	79.6625	73.7111
MPP3	88.4333	80.36	92.33	55.0375	78.4125	73.3778
MPP4	85.8667	73.76	91.99	50.4	70.5125	68.6556
All data points	Fancc+/+																														Fancc-/-
LK	89.2	91.6	89.8	98.1	76.3	86.2	83	93.2	98.9		91.2	84.4	82.5	96.9	71.8	51.5	62.7	82	97.1	79.7	87.6	97.7	94.7	98	98.9	97.1	89.6	97.6	95.2	70.7	68.9	75.5	67.6	35.5	15.9	20.9	83.7	37.6			71	91.1	71.1	70.6	72.6	53.5	64	86
LSK	90.2	94.2	92.2	98.8	78.7	80	79.2	93.3	97		92.8	84.8	85.2	98.4	73.6	34.1	67.5	84.5	96.3	74.9	88.7	97.5	94.9	96.4	99.1	97.2	94.1	97.3	95.4	63.2	65	81.2	74.3	35.7	16.1	21.5	87.6	37.7			81.3	90.6	72.5	77.5	74.3	48.4	71	85.7
LT-HSC	95.8	97.2	92.1	98.6	87	92.7	85.4	90.5	94.5		93.6	97.1	90.3	99	89.1	22.1	72.6	96.5	93.4	78.1	95	98.1	96.3	95.5	99	97.4	96.6	97.7	93.8	54.6	71	71.4	83.8	28.3	10.9	16.3	90.8	45.5			83	85.1	84.8	84	87.2	32.2	85.8	94.5
ST-HSC	95.4	98.5	93.9	98.4	84.5	87.3	87.2	89.8	97.6		96.5	94.1	85.3	99.1	88.7	42.3	76.8	95.6	97.6	75.7	90.4	95.5	92.6	97	97.8	96.4	94.8	98.2	96.9	56.2	77.5	90.4	77.2	34.4	0	15.5	83.2	48.2			93.2	96.8	70.9	86.5	90.9	49.1	85.7	84.6
MPP2	87.9	92	92.3	98.5	71.7	78.6	86.5	94.8	95.6		89.4	89.9	83.7	98.2	83.6	40.7	67	84.1	95.1	77.4	81.5	94.9	92.5	94.3	96.8	94.7	92.7	96.9	94.6	71.6	68.2	81	73.6	41.6	16.6	19	90.7	42.1			86.6	92.1	77.9	77.7	84.5	53.4	76.1	89
MPP3	90.2	94.1	91.3	98.9	74.4	78.7	80.9	92.9	94.5		95.4	86.8	84.9	97.8	77.2	38.4	68.7	84.7	93.4	76.3	84.2	96.6	93.8	95.9	97.9	98.3	94.3	98.1	96.9	67.3	72	83.4	76.6	36.5	19.4	23.9	86.9	41.6			83.5	92.7	74.5	79.7	79.1	57.3	72.4	88.1
MPP4	86	92	89.9	98.8	76.6	71.2	72.9	92.6	92.8		94.9	73.5	82.3	98.1	62.9	37.4	63.2	69.9	90.1	65.3	79.8	96.1	92.6	95	96.6	96.7	92.7	97.5	96.7	76.2	56.1	83.5	72.1	32.7	17.4	25.6	84.1	31.7			76.5	90.1	66.1	74.6	63	55.3	58.3	80.2

## Sheet: Panel J
Table 1
	Fancc+/+			Fancc-/-			KO
	1	1		1	1		1	1
CMP	2.27127	1.45677	1.62806	1.25351	1.52675	1.73594
GMP	2.46029	1.44611	1.52608	1.27814	1.31047	1.8008
MEP	2.29656	1.75776	1.71971	0.987298	1.53863	1.68591
MP	2.40908	1.73567	1.76343	1.35202	1.52304	1.97435
LSK	2.19271	2.49438	2.17037	1.33657	1.69496	1.60405
LT-HSC	2.16894	2.20575	1.9024		2.19047	1.59554
ST-HSC	2.0883	1.96702	1.86117	1.41844	1.77886	1.69017
MPP2	2.46562	1.80211	1.71072	1.22087	1.60887	1.86456
MPP3	1.98065	1.83997	1.97983	1.36433	1.64232	1.91188
MPP4	2.04887	1.74323	1.85335	1.17965	1.38697	2.01073
