# Supplementary material for: Dynamic tracking of native precursors in adult mice
Source: eLife. 2024 Dec 5;13:RP97504. doi: 10.7554/eLife.97504 (PMC11620740; doi:10.7554/eLife.97504)
Supplement: Figure 5—source data 1. [file elife-97504-fig5-data1.xlsx]

## Sheet: Figure 5B left
Table 1
All data points		Fancc+/+
		1	1
1	1	3.86	2.72	3.59	3.67	2.73	3.06	3.65	4.03	3.83	3.95	6.05	4.04	3.26	6.11	3.79	4.85	3.85	4.41	3.48	4.67				2.24	3.15	3.88	2.38	1.67	5.01	5.02	4.7	4.87	6.27	7.74			2.64	4.93	3.89	4.51	4.76	5.44	4	4.95	5.54	5.15
2	2		3.38		4.68	3.68			4.09			9.25	5.88		5.75	3.86	5.82	4.98	3.48	3.95	7.03	6.66	3.56	7.68	3.28	3.89	5.17	2.88	2.45	4.68	4.41	4.31	3.79	5.83	3.66	2.13	7.75	2.37	5.48	4.76	4.77	5.44			5.58	6.53	5.55	2.9	2.84
3	3	6.48	4.13	5.68	6.22	4.92	4.14	5.19	4.84	5.83	6.15	10.15	6.58	4.28	9.39	5.48	6.5	5.91	4.09	4.64	9.53	9.06	4.4	10.29	3.42	3.97	5.3			5.63	4.49	4.18	4.59	6.76	4.25		8.7	3.17	6.16	5.33	4.12	4.09	4.28		4.8	5.1	5.86	3.21	3.4
4	4	7	4.7	6.35	8.35	5.76	4.84	5.89	6.26	5.85	8.69	12.17	6.64	4.42	9.48	5.61	7.54	6.22	4.54	5.14	9.63	10.08	4.49	12.98	2.83	3.84	5.16			4.52	4.44	4.62	5.87	7.67	4.87	2.18	10	4.11	6.29	6.79	5.21	5.11		4.74	5.87	7.14	6.39	5.17	3.31
5	5	6.52	4.18	5.31	7.48	5.35	4.38		5.59	5.58	7.58	12.52	8.39	4.26	9.44	6.05	8.17	7	4.53	6.12	11.17	11.89	4.52	10.29	3.35	4.14	5.78	3.85	2.82	6.73	5.77	5.04	5.57				9.37	3.71	6.77	5.99	4.67	4.89	5.7		5.75	6.9	6.91	5.18	3.35
6	6		4.51	5.4	7.52	6.23	4.35	5.75	5.6	5.61	7.79			4.83		7.38			4.68	5.61	11.12	12.12	5.26		3.12			4.25			5.35	4.58	6.03				11.32	3.28	7.95	6.29					5.79	6.71	7.61		2.72
7	7	8.06	4.99	6.16		7.08	4.86		6.02	6.51	7.86		8.82				9.56	6.9	4.04	5.82	11.82		5.32	12.38	3.5			3.91			4.84	4.5	7.06				11.04								7.13	6.94	8.95		3.45
Average of biological replicates		Fancc+/+							Fancc+/-							Fancc-/-
		1	1						1	1						1	1
1	1	3.765	4.3025	4.26636	4.581	4.66571			3.488	3.91789	2.99909	5.445	4.29875	4.152	5.03167	3.46385	4.87143	4.11125	3.425
2	2	5.16	5.277	4.17154	4.622	4.9775			4.338	4.408	5.32636	4.839	4.89667	4.27722	4.728	4.38571	4.63429	4.675	3.695
3	3	5.85917	6.68818	5.129	4.50182	6.01			5.47933	5.81667	5.77917	5.844	4.708	4.84941	5.84667	4.89875	5.30769	5.01545	4.84667
4	4	6.875	7.28455	5.09091	5.24846	6.02187			6.21267	6.87167	5.91364	6.104	5.215	5.414	5.277	5.46933	5.17769	5.22333	5.19111
5	5	6.62545	7.58545	5.242	5.20692	6.40333			5.786	6.52412	7.07417	6.208	5.53769	5.42353	5.11	5.435	5.96727	5.90167	5.41125
6	6	5.86222	7.28571	5.775	5.6875	7.20143			5.84846	6.74471	7.09727	6.66125	5.16538	5.37538	5.315	5.84417	5.616	6.379	5.79286
7	7	6.70667	7.97714	5.80833	5.94833	8.24333			6.57667	7.2575	8.77625	6.3375	6.348	5.87111	5.15	6.164	6.18667	6.658	6.09667
[truncated: 165 more columns]

## Sheet: Figure 5B right
Table 1
All data points		WT
1	1	0.89	0.58	0.9	0.8	0.67	0.53	0.61	0.67	0.78	0.83	1.71	0.65	0.8	1.56	0.73	1.37	1.08	0.52	0.37	0.59				0.42	0.56	0.8	0.54	0.28	0.41	0.55	0.4	0.38	0.86	1.49			0.238	0.82	0.49	0.36	0.56	0.46	0.64	0.9	0.67	0.39
2	2		0.91		1.96	1.37			1.45			3.45	1.83		1.85	0.93	1.56	1.63	0.92	0.59	1.67	2.15	1.09	2.39	0.54	0.44	0.8	0.58	0.32	1.38	0.96	0.94	0.9	1.54	0.71	0.28	2.48	0.49	1.5	1.16	1	1.03			1.36	1.11	0.97	0.84	0.57
3	3	2.4	1.41	2.18	2.97	1.81	1.2	1.5	1.28	2.2	1.83	4.74	2.86	1.39	2.78	1.38	2.7	2.66	1.11	0.93	3.08	3.05	1.58	4.02	0.98	0.93	1.08			1.98	1.56	1.41	1.66	2.41	1.25		3.54	0.55	2.54	2.07	1.27	1.62	1.65		2.08	1.71	1.66	0.89	0.81
4	4	2.66	1.39	2.85	2.96	1.95	1.91	2	1.65	2.67	2.24	6.36	3.01	1.76	3.05	1.62	3.44	3.11	1.66	1.32	4.05	3.97	2.34	5.85	1.09	1.13	1.99			2.32	1.89	1.81	2.2	3.49	1.63	0.5	4.52	0.81	3.68	2.64	1.98	2.16		1.84	2.79	2.48	2.11	1.33	1.16
5	5	2.92	1.88	2.91	3.48	2.77	1.79		1.84	2.99	2.48	7.94	3.97	1.98	3.85	2.09	3.88	3.71	1.88	2.03	5.22	5.03	2.26	6.54	1.35	1.27	2.6	1.63	1.12	2.53	2.38	2.13	2.85				5.68	0.9	4.39	3.12	2.21	2.86	2.59		3.62	3.02	2.59	1.82	1.28
6	6		2.14	3.11	3.94	3.47	2.01	2.89	2.08	3.98	3.47			2.47		2.31			2.31	2.07	5.71	5.39	2.5		1.64			1.87			2.87	2.71	3.66				6.61	1.38	5.33	3.41					4.2	3.71	3.03		1.15
7	7	4.16	2.23	3.49		3.78	2.48		2.2	4.67	3.87		4.82				5.8	5.17	2.17	2.2	7.18		3.19	10.08	1.6			2.18			2.9	2.83	3.87				7.41								4.59	4.03	3.92		1.48
Average of biological replicates		WT							HET							KO
1	1	0.801667	0.8775	0.608182	0.5528	0.931429			0.721333	0.816316	0.630636	1.18	0.565688	0.5731	0.8275	0.773077	0.645714	0.45325	0.63
2	2	1.82833	1.478	0.913077	1.003	1.34667			1.464	1.714	1.58091	1.362	0.963333	1.03444	1.202	1.33643	1.02679	1.03871	1.105
3	3	2.19833	2.24364	1.68	1.53182	2.00583			1.91867	2.11444	2.1425	1.956	1.546	1.62588	1.82833	1.6925	1.69817	1.70182	1.74667
4	4	2.6375	2.92455	2.05182	2.04154	2.4775			2.36067	2.83389	2.29091	2.558	1.92357	2.177	2.013	2.314	2.21785	1.97083	2.02978
5	5	3.17909	3.49727	2.354	2.49308	3.3825			2.81867	3.23706	3.7	3.132	2.43615	2.75824	2.50286	2.77562	2.85018	2.94833	2.5925
6	6	3.01	3.25143	3.22667	3.15125	3.90286			3.07231	3.63706	4.21818	3.2725	2.53769	2.94154	2.8425	3.2225	3.18	3.348	3.14286
7	7	3.52222	5.11286	3.465	3.19	4.85833			3.37889	4.22667	4.99375	3.7875	3.594	3.41444	2.6	3.646	3.68778	3.934	3.65
[truncated: 165 more columns]

## Sheet: Figure 5C
Table 1
	WT							HET							KO
1	3.83575		4.15686	4.12849	3.68391			3.71759	3.9068	3.85122		4.03419	3.74451	4.04798	3.66509	3.82165	3.8533
2		3.97863	3.67671	3.85971	3.59215				4.00194		4.10387	3.96869	4.07608	2.97256	3.34149	3.65366	3.37433
3	3.58914	3.68794	4.09373	4.2237	4.04892			3.92892	3.67272	3.73938	3.82056	3.7145	4.01881		3.25517	4.11714	3.58011
4	3.52267	3.60697	3.69721	3.49184	3.4659			3.43691	4.0732			3.58415	3.78596	3.48538	3.25862	3.4618	3.30176	4.03216
5	3.69613	4.01225	3.53936	4.01204	3.25307			4.16439	3.934	3.49289	3.72952	3.84812	3.58769	3.73088	3.45251	4.10765	3.76698	3.71688
6		3.42784	3.12964	3.05378	3.30922			3.40372	3.89545	3.04143	3.45433	3.98143	3.48527		3.5077	3.48738	3.20202	3.13045
7	3.57987	3.18	3.38309	3.30574	3.45452			3.84187	3.80489	3.11562	3.36398	3.62058	3.52377		3.33091	3.44943	2.91263	3.29641

## Sheet: Figure 5D
Table 1
	WT					HET					KO
MP	3.03426	2.74471	3.42664	2.81635	2.80934	3.33768	2.98187	3.63928	2.99024	3.37644	2.85584	2.81448	2.80356	2.99153
HSPC	3.59839	3.08407	3.98221	3.27532	3.77042	3.98346	3.08562	3.26251	3.01508	3.33569	2.77989	2.87563	2.85637	3.17609
LT-HSC	2.82538	2.50514	2.43197		2.78124	2.99996	2.95076	2.30309	2.69205	2.96675	2.48057	2.32692	2.48264
ST-HSC	2.70742	3.0185	2.53919	1.87714	2.56431	3.02836	2.7289	2.30873	2.78568	2.34029		2.39256		2.00988
MPP2	3.24022	3.09233		2.4657	2.7665	3.47747	2.6753	2.97694	2.95695	2.95578	2.53377	2.72086	2.56333	2.48734
MPP3	2.8491	2.6791	2.73421		2.95089	3.17023	2.91418	3.11755	2.9539	2.63521	2.53798	2.90993	2.46619
MPP4	3.14973	2.85648	3.22702	3.05371	2.69635	3.83148	2.89558	3.25216	2.78248	3.28904	2.76925	2.85237	2.9229	2.7936

## Sheet: Figure 5F
Table 1
All data points	WT-1										HET-1										HET-2										KO-1										KO-2
1	77.9141	79.0274	78.1818	81.1302	77.3374	82.6748	78.1029	75.3862	80.5247	77.9381	82.7068	77.9817	78.2258	77.8455	81.3953	84.0285	80.9766	77.9011	79.571		76.297	75.6345	72.5986	69.6846	76.6811	75.4793	76.2386	72.4138	76.8453		75.7669	72.1212	66.9043	71.6312	69.9279	73.6842	70.6357				70.9184	66.6328	66.7005	65.535	70.6599	69.9294	66.5323	65.4434	66.5653
2	78.4274	86.5327	77.3414	85.6999	82.8629	81.3835	82.3232	81.6717			83.9232	85.1665	80.3229	80.9476	81.4141	83.4853	84.2424	81.2311	86.7944		75.5308	84.9343	82.7621	78.002	73.8384	80.7847	77.7889	79.2129	78.9899	82.6263	75.0253	67.6411	56.6598	70.7366	67.5101	67.003					72.4068	56.1297	61.6785	66.4985	62.5381	67.9112	55.7143	52.834	61.1111
3	79.2472	81.643	89.7487	73.8911	86.2487	85.4839	84.0565	77.7553	81.7629		85.4398	88.5743	82.7761	83.3333	83.4844	85.0806	83.6458	81.2753	86.8077		82.6263	89.7074	84.1734	81.1931	82.8802	78.5282	79.2683	82.7236	83.871		63.5802	60.9929	62.5631	57.1862	61.4141	63.004					68.6176	56.5217	56.0606	75.504	55.5106	73.3333	51.0101	45.1972	57.7778
4	82.1611	67.1079	84.0404	90.8081	72.449	86.47	87.8695	87.1821	74.7702	82.9615	86.9036	89.8288	85.9454	85.351	86.2765	88.1809	84.413	82.3529	85.1324		85.7868	91.6472	84.2105	81.0398	83.9232	79.7959	80.6288	86.6532	84.3117		56.7901	59.6292	45.6726	60.3502	54.9439	58.9397	63.1365				67.788	60.8205	53.641	79.4355	54.2355	77.0721	48.3579	38.278	55.3498
Average of biological replicates	Fancc+/+/Fancc+/-			Fancc-/-
1	78.8218	80.0703	74.6525	71.5245	67.6574	66.1356
2	82.0303	83.0586	79.447	67.4293	61.8691	65.9767
3	82.2042	84.4908	82.7746	61.4568	59.9481	63.975
4	81.582	86.0427	84.2219	57.066	59.442	62.7365

## Sheet: Figure 5G
Table 1
		Fancc+/+/Fancc+/-			Fancc-/-
1	1	2.51766	2.7528	1.88724	2.09202	1.62929	1.85418
2	2	1.73064	1.63484	1.72528	1.90427	1.69852	1.50591
3	3	1.70612	1.79157	1.97284	1.85683	1.85498	1.47967
4	4	1.73768	1.76244	1.70221	1.90502	1.85403	1.44517

## Sheet: Figure 5H
Table 1
All data points		WT1										WT2										WT3										KO1										KO2
1	1	45.6122	77.8455	74.3927	73.6097	76.0121	72.9949	69.3548	70.8207	75.1259	75.0763	66.6667	79.2049	78.9047	78.2299	75.1766	49.6914	72.4975	72.5331	74.2132	81.4402	74.0854	73.8384	68.9655	69.1837	71.2831	70.618	76.0121	71.3701	70	66.7849	46.4615	56.371	70.6357	46.6938	53.9246	34.6708	35.9837	41.6327	49.0872	51.6751	64.1548	74.5455	65.9574	72.4242	69.7062	42.6943	68.5917	63.4888
2	2	47.0408	81.8394	80.5247	84.0404	86.1336	81.206	83.1483	80.7415	81.4703	85.7719	83.8547	82.3944	79.9799	83.5851	81.6244	59.9638	76.892	72.5806	81.3953	83.9196	82.3589	77.0707	75.1008	77.2177	76.1329	77.8449	78.2038	76.6365	75.9315	72.7273	53.6437	43.0151	80.3229	50.3024	53.1282	31.1927	40.546	46.0606	50.0503	46.5187	70.5882	81.1682	64.9849	73.1388	72.004	55.4648	65.9596	68.9203
3	3	50.5539	82.7968	83.6653	85.5847	88.9225	83.1325	85.8006	80.222	84.4758	87.8514	87.5377	81.9881	78.4491	87.3367	78.4583	58.9304	75.7789	68.5859	85.1515	84.0886	82.5103	79.1667	78.5933	81.1475	81.0591	81.1224	76.4706	78.6008	79.065	73.7384	56.5128	38.33	84.6231	46.4032	50.7553	30.9091	37.5629	42.1638	50.1006	38.2056	66.8681	79.3555	64.9547	68.1496	69.9497	49.9495	67.1385	67.7419
4	4	47.8305	86.1476	87.9555	87.714	91.9017	84.4601		77.6089	87.361	90.9823	90.1301	80.9331	78.6869	90.5424	86.1895	61.4446	79.7776	63.9758	86.9919		84.238	80.359	78.6448	83.6568	83.2827	83.2482	76.7802	80.021	81.781	77.3057		39.8985	87.891	44.8835	46.0061	31.9192	35.461	36.9543	48.137	28.817	62.2356	77.2957	68.0444	65.3535	72.379	36.5031	66.6667	64.539
5	5	43.7941	85.9879	89.1837	89.3253	93.6188	85.3535	84.5298	76.2677	88.1818	90.8267	91.8315	79.0323	79.4924	91.4315	85.6566	63.0457	77.1574	60.5662	88.1699	79.8371	82.4773	80.2419	80.2817	85.1256	85.5222	85.5346	75.8097	80.7035	82.4597	79.8583		39.311	88.9225	47.6876	45.4822	29.7872	33.2651	33.5062	47.8261	22.7733	60.7505	73.9657	67.2709	62.9555	69.5652	29.2634	65.6504	62.2564
Average of biological replicates		Fancc+/+			Fancc-/-
1	1	71.0845	72.8558	71.2141	48.7136	64.562	56.19
2	2	79.1917	78.619	76.9225	49.4781	68.4944	63.408
3	3	81.3005	78.6305	79.1474	47.5567	67.1733	64.1971
4	4	82.4402	79.8524	80.9317	44.4408	65.542	64.9254
5	5	82.7069	79.622	81.8015	43.1735	63.4505	62.2781
[truncated: 11 more columns]

## Sheet: Figure 5I
Table 1
		Fancc+/+			Fancc-/-
	1	2.09808	2.40978	2.45245	1.83839	2.40215	1.85291
	2	1.79973	1.90981	2.27078	1.5594	1.60885	1.54594
	3	2.02981	1.89279	2.32146	1.75164	1.62125	1.5377
	4	1.70593	2.08908	2.05599	1.56032	1.43187	1.5413
	5	1.65153	2.08352	1.90673	1.40898	1.24944	1.6786
