# Supplementary material for: Dynamic tracking of native precursors in adult mice
Source: eLife. 2024 Dec 5;13:RP97504. doi: 10.7554/eLife.97504 (PMC11620740; doi:10.7554/eLife.97504)
Supplement: Supplementary file 1. [file elife-97504-supp1.xlsx]

## Sheet: Transplant
Transplant PB Confetti analysis
Marker		Fluorophore	Dilution	Company	Clone
Fcblock/TruStain FcX			500	Biolegend	93
X-axis	B220	APC	400	Biolegend	RA3-6B2
	Gr-1	APC	400	Biolegend	RB6-8C5
	CD1b	APC	400	Biolegend	M1/70
Y-axis	B220	Pacific Blue	200	Biolegend	RA3-6B2
	CD3e	Pacific Blue	200	Biolegend	KT3.1.1
CD45.2		APC-Cy7	200	Biolegend	104
CD45.1		BV711	100	Biolegend	A20
Transplant BM Confetti analysis
WBM panel
Marker		Fluorophore	Dilution	Company	Clone
Lineage (B220, CD3e, CD11b, Gr-1, TER119)	B220	APC	160	Biolegend	RA3-6B2
	CD3e	APC	80	Biolegend	145-2c11
	CD11b	APC	320	Biolegend	M1/70
	Gr-1	APC	320	Biolegend	RB6-8C5
	TER119	APC	80	Biolegend	TER119
Sca-1		APC-Cy7	640	Biolegend	D7
CD34		AF700	40	Invitrogen	RAM34
cKit		BUV395	80	BD Horizon	2B8
CD45.1		BV421	400	Biolegend	A20
CD45.2		BV650	80	Biolegend	104
CD16/32		BV711	320	Biolegend	93
IL7Ra		BV785	80	Biolegend	A7R34
Lineage depleted panel
Marker		Channel	Dilution	Company	Clone
Fc Block			500
Lineage (B220, CD3e, CD11b, Gr-1, TER119)	B220	APC	160	Biolegend	RA3-6B2
	CD3e	APC	40	Biolegend	145-2c11
	CD11b	APC	320	Biolegend	M1/70
	Gr-1	APC	320	Biolegend	RB6-8C5
	TER119	APC	80	Biolegend	TER119
CD48		AF700	400	Biolegend	HM48-1
Sca-1		PE-CY7	800	Biolegend	D7
Flk2		BV421	40	Biolegend	A2F10
CD150		BV605	80	Biolegend	TC15-12F12.2
cKit		BUV395	160	BD Horizon	2B8
CD45.1		BV711	200	Biolegend	A20
CD45.2		APC-Cy7	400	Biolegend	104

## Sheet: Native animals
PB Confetti analysis
Marker		Fluorophore	Dilution	Company	Clone
Fcblock/TruStain FcX			500	Biolegend	93
X-axis	B220	APC	400	Biolegend	RA3-6B2
	Gr-1	APC	400	Biolegend	RB6-8C5
	CD1b	APC	400	Biolegend	M1/70
Y-axis	B220	Pacific Blue	200	Biolegend	RA3-6B2
	CD3e	Pacific Blue	200	Biolegend	KT3.1.1
BM Confetti analysis
WBM panel
Marker		Channel	Dilution	Company	Clone
Lineage (B220, CD3e, CD11b, Gr-1, TER119)	B220	APC	160	Biolegend	RA3-6B2
	CD3e	APC	80	Biolegend	145-2c11
	CD11b	APC	320	Biolegend	M1/70
	Gr-1	APC	320	Biolegend	RB6-8C5
	TER119	APC	80	Biolegend	TER119
Sca-1		APC-Cy7	640	Biolegend	D7
CD34		AF700	40	Invitrogen	RAM34
Flk2		BV421	40	Biolegend	A2F10
CD150		BV605	160	Biolegend	TC15-12F12.2
cKit		BUV395	80	BD Horizon	2B8
CD16/32		BV711	320	Biolegend	93
IL7Ra		BV785	80	Biolegend	A7R34
CD48		PE-CY7	400	Biolegend	HM48-1
Lineage depleted panel
Marker		Channel	Dilution	Company	Clone
Fc Block			500
Lineage (B220, CD3e, CD11b, Gr-1, TER119)	B220	APC	160	Biolegend	RA3-6B2
	CD3e	APC	40	Biolegend	145-2c11
	CD11b	APC	320	Biolegend	M1/70
	Gr-1	APC	320	Biolegend	RB6-8C5
	TER119	APC	80	Biolegend	TER119
CD48		AF700	400	Biolegend	HM48-1
Sca-1		APC-Cy7	320	Biolegend	D7
Flk2		BV421	40	Biolegend	A2F10
CD150		BV711	160	Biolegend	TC15-12F12.2
cKit		BUV395	160	BD Horizon	2B8
Lineage panel (for induction specificity analysis)
Marker		Fluorophore	Dilution	Company	Clone
CD3e		Pacific Blue	200	Biolegend	145-2c11
CD8		APC-Cy7	200	Biolegend	53-6.7
NK1.1		AF700	100	Biolegend	PK136
Ly6G		PE-CY7	800	Biolegend	1A8
Ly6C		APC	320	Biolegend	HK1.4
CD11b		PerCP	200	Biolegend	M1/70
CD11c		BV785	50	Biolegend	N418
IA-IE		BV510	100	Biolegend	M5/114.152
CD45.2		BV650	50	Biolegend	104
B220		BV711	160	Biolegend	RA3-6B2
CD41		BV421	100	Biolegend	MWRReg30
Spleen Confetti analysis
Marker		Fluorophore	Dilution	Company	Clone
CD3e		Pacific Blue	100	Biolegend	145-2c11
CD8		APC-Cy7	200	Biolegend	53-6.7
CD4		APC	100	Biolegend	10042
CD11b		PerCP	100	Biolegend	M1/70
B220		BV711	160	Biolegend	RA3-6B2
