# Supplementary material for: Dynamic tracking of native precursors in adult mice
Source: eLife. 2024 Dec 5;13:RP97504. doi: 10.7554/eLife.97504 (PMC11620740; doi:10.7554/eLife.97504)
Supplement: Supplementary file 2. [file elife-97504-supp2.xlsx]

## Sheet: Sheet1
Table S3 Number of animals per group
	Figure 2
	PB	1	2	3	Total
	High precursor number	15	10	10	35
	Low precursor number	14	10	8	32
	BM	1	2	3	Total
	High precursor number	14	9	9	32
	Low precursor number	14	8	7	29
	Figure 3
	PB	1	2	3	4	Total
	Adult-induction	14	16	22	22	74
	BM	1	2	3	4	Total
	Adult-induction	10	8	8	9	35
	Figure 4
	BM	1	2	3	4	5	Total
	UT	10	8	8	9		35
	5-FU	7	8	6	7	7	35
	Figure 5
	PB	1	2	3	4	5	6	7	Total
	Fancc+/+	12	11	13	15	17			68
	Fancc+/-	15	19	12	10	16	22	14	108
	Fancc-/-	17	14	16	6	9			62
	BM	1	2	3	4	5	6	Total
	Fancc+/+	9	6	6	5	7		33
	Fancc+/-	9	12	6	8	4	9	48
	Fancc-/-	10	8	11	6			35
	PB	1	2	3	Total
	Young Fancc+/+	10			10
	Young Fancc+/-	10	10		20
	Young Fancc-/-	7	9	9	25
	BM	1	2	3	Total
	Young Fancc+/+	9			9
	Young Fancc+/-	9	9		18
	Young Fancc-/-	6	9	9	24
	PB	1	2	3	Total
	Ageing Fancc+/+	10	10	10	30
	Ageing Fancc-/-	10	10	10	30
	BM	1	2	3	Total
	Ageing Fancc+/+	9	9	10	28
	Ageing Fancc-/-	8	8	9	25
