# Supplementary material for: Dynamic tracking of native precursors in adult mice
Source: eLife. 2024 Dec 5;13:RP97504. doi: 10.7554/eLife.97504 (PMC11620740; doi:10.7554/eLife.97504)
Supplement: Supplementary file 3. [file elife-97504-supp3.xlsx]

## Sheet: Sheet1
HSC-Scl-CreERT
Transgenic band sits at 209BP, internal control sits at 585bp (endogenous control)
Forward primers
mScl/Tal1 F	CAACAACAACCGGGTGAAGA
1260_1 (TACONIC ctrl)	GAGACTCTGGCTACTCATCC
Reverse primers
Mx-Cre JH43 (Cre spec.)	CTTGCACCATGCCGCCCACGAC
1260_2 (TACONIC ctrl)	CCTTCAGCAAGAGCTGGGGAC
Confetti
Transgenic band sits at 300bp, wildtype band sits at 385
Forward primers
1341 (Tg F)	GAA TTA ATT CCG GTA TAA CTT CG
oIMR8545 (WT F)	AAA GTC GCT CTG AGT TGT TAT
Reverse primers
oIMR8916 (common)	CCA GAT GAC TAC CTA TCC TC
Fancc
Forward primers
WT	GAG GAA ACG CCA CAT TTC AG
mutant	ACG AGA TCA GCA GCC TCT GT
Reverse primers
Common Reverse	AGG TCT GGA GAA ATG GCT CA
